# Supplementary material for: A Non-Linear Biostatistical Graphical Modeling of Preventive Actions and Healthcare Factors in Controlling COVID-19 Pandemic
Source: MDPI journal article supplement (doi:10.3390/ijerph18094491), 2021-04-23
Supplement: s1 [file s1]

## Supplementary File

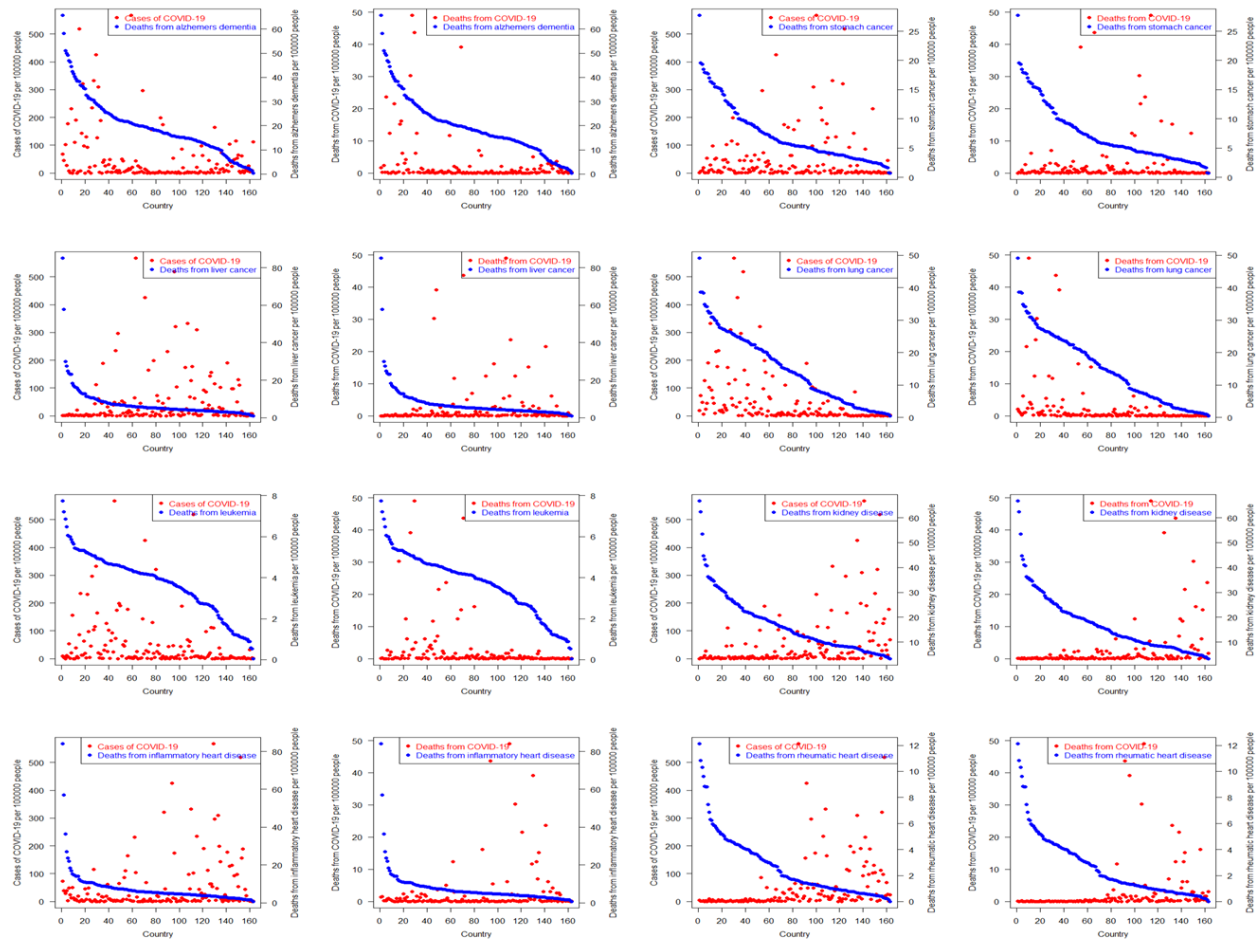

**Figure S1.** Association between COVID-19 cases and case fatality and some selected comorbidities death rates for all 163 countries where COVID-19 infection was identified on April 20, 2020.[Note: Comorbidity variables considered here are alzheimer dementia, stomach cancer, liver cancer, lung cancer, leukemia, kidney disease, inflammatory heart disease, and rheumatic heart disease. In each pair of graphs from left to right with a selected comorbidity variables are showing COVID-19 confirmed cases and deaths respectively. The country list corresponding to the index in the horizontal axis of all figures are presented in Table S1].

**Table S1.**Country list corresponding to the index in the horizontal axis of Figure 2.

| Physician      |       | Nurses and Midwives |       | Hospital Bed     |       | Life Expectancy |       |
|----------------|-------|---------------------|-------|------------------|-------|-----------------|-------|
| Country        | Index | Country             | Index | Country          | Index | Country         | Index |
| Cuba           | 1     | Switzerland         | 1     | Japan            | 1     | Japan           | 1     |
| Greece         | 2     | Norway              | 2     | South Korea      | 2     | Switzerland     | 2     |
| Austria        | 3     | Denmark             | 3     | Belarus          | 3     | Singapore       | 3     |
| Georgia        | 4     | Iceland             | 4     | Ukraine          | 4     | Italy           | 4     |
| Portugal       | 5     | Finland             | 5     | Russia           | 5     | Spain           | 5     |
| Norway         | 6     | Germany             | 6     | Germany          | 6     | Australia       | 6     |
| Lithuania      | 7     | Australia           | 7     | Bulgaria         | 7     | Iceland         | 7     |
| Switzerland    | 8     | Uzbekistan          | 8     | Austria          | 8     | South Korea     | 8     |
| Germany        | 9     | Ireland             | 9     | Hungary          | 9     | Israel          | 9     |
| Sweden         | 10    | Luxembourg          | 10    | Mongolia         | 10    | Sweden          | 10    |
| Belarus        | 11    | Sweden              | 11    | Romania          | 11    | France          | 11    |
| Italy          | 12    | Belarus             | 12    | Kazakhstan       | 12    | Malta           | 12    |
| Bulgaria       | 13    | Japan               | 13    | Czech Republic   | 13    | Canada          | 13    |
| Russia         | 14    | New Zealand         | 14    | Poland           | 14    | Norway          | 14    |
| Malta          | 15    | Belgium             | 15    | Lithuania        | 15    | Ireland         | 15    |
| Argentina      | 16    | France              | 16    | Gabon            | 16    | New Zealand     | 16    |
| Spain          | 17    | Netherlands         | 17    | France           | 17    | Greece          | 17    |
| Iceland        | 18    | United States       | 18    | Slovakia         | 18    | Luxembourg      | 18    |
| Uruguay        | 19    | Canada              | 19    | Barbados         | 19    | Netherlands     | 19    |
| Czech Republic | 20    | Malta               | 20    | Moldova          | 20    | Portugal        | 20    |
| Denmark        | 21    | Slovenia            | 21    | Belgium          | 21    | Finland         | 21    |
| Maldives       | 22    | Russia              | 22    | Serbia           | 22    | Belgium         | 22    |
| Israel         | 23    | Kazakhstan          | 23    | Latvia           | 23    | Austria         | 23    |
| Australia      | 24    | United Kingdom      | 24    | Croatia          | 24    | Germany         | 24    |
| Netherlands    | 25    | Czech Republic      | 25    | Cuba             | 25    | Slovenia        | 25    |
| Slovakia       | 26    | Austria             | 26    | Argentina        | 26    | United Kingdom  | 26    |
| Estonia        | 27    | Maldives            | 27    | Azerbaijan       | 27    | Cyprus          | 27    |
| Jordan         | 28    | Lithuania           | 28    | Estonia          | 28    | Denmark         | 28    |
| Azerbaijan     | 29    | Cuba                | 29    | Switzerland      | 29    | Costa Rica      | 29    |
| Kazakhstan     | 30    | Brazil              | 30    | Luxembourg       | 30    | Chile           | 30    |
| Mongolia       | 31    | Singapore           | 31    | Slovenia         | 31    | Qatar           | 31    |
| France         | 32    | Kuwait              | 32    | Kyrgyzstan       | 32    | Maldives        | 32    |
| Latvia         | 33    | Ukraine             | 33    | Malta            | 33    | Czech Republic  | 33    |
| Moldova        | 34    | Libya               | 34    | China            | 34    | Barbados        | 34    |
| Finland        | 35    | South Korea         | 35    | Maldives         | 35    | Poland          | 35    |
| Croatia        | 36    | Azerbaijan          | 36    | Greece           | 36    | Lebanon         | 36    |
| Hungary        | 37    | Hungary             | 37    | Armenia          | 37    | Cuba            | 37    |
| New Zealand    | 38    | Croatia             | 38    | Papua New Guinea | 38    | Estonia         | 38    |

|                        |    |                        |    |                        |    |                        |    |
|------------------------|----|------------------------|----|------------------------|----|------------------------|----|
| Belgium                | 39 | Brunei                 | 39 | Uzbekistan             | 39 | United States          | 39 |
| Ukraine                | 40 | Romania                | 40 | Montenegro             | 40 | Panama                 | 40 |
| Ireland                | 41 | Portugal               | 41 | Australia              | 41 | Croatia                | 41 |
| Luxembourg             | 42 | Estonia                | 42 | Libya                  | 42 | Albania                | 42 |
| United Kingdom         | 43 | Kyrgyzstan             | 43 | Norway                 | 43 | Oman                   | 43 |
| Slovenia               | 44 | Slovakia               | 44 | Sri Lanka              | 44 | United Arab Emirates   | 44 |
| Armenia                | 45 | Bosnia and Herzegovina | 45 | Seychelles             | 45 | Turkey                 | 45 |
| Romania                | 46 | Montenegro             | 46 | Bosnia and Herzegovina | 46 | Uruguay                | 46 |
| Kuwait                 | 47 | Italy                  | 47 | Mauritius              | 47 | Slovakia               | 47 |
| United States          | 48 | Qatar                  | 48 | Cyprus                 | 48 | Bosnia and Herzegovina | 48 |
| Saudi Arabia           | 49 | Poland                 | 49 | Portugal               | 49 | Colombia               | 49 |
| Canada                 | 50 | Uruguay                | 50 | Netherlands            | 50 | Thailand               | 50 |
| Cyprus                 | 51 | Armenia                | 51 | Finland                | 51 | Bahrain                | 51 |
| Serbia                 | 52 | Spain                  | 52 | Italy                  | 52 | Ecuador                | 52 |
| Uzbekistan             | 53 | Bulgaria               | 53 | Suriname               | 53 | Sri Lanka              | 53 |
| Lebanon                | 54 | Suriname               | 54 | Trinidad and Tobago    | 54 | Algeria                | 54 |
| Japan                  | 55 | South Africa           | 55 | Israel                 | 55 | China                  | 55 |
| Montenegro             | 56 | Saudi Arabia           | 56 | Spain                  | 56 | Peru                   | 56 |
| South Korea            | 57 | Israel                 | 57 | Ireland                | 57 | Morocco                | 57 |
| Poland                 | 58 | Latvia                 | 58 | Iceland                | 58 | Montenegro             | 58 |
| Singapore              | 59 | Barbados               | 59 | Lebanon                | 59 | Tunisia                | 59 |
| Mexico                 | 60 | Serbia                 | 60 | Sao Tome and Principe  | 60 | Iran                   | 60 |
| Libya                  | 61 | Moldova                | 61 | Albania                | 61 | Hungary                | 61 |
| Mauritius              | 62 | Seychelles             | 62 | Turkey                 | 62 | Argentina              | 62 |
| Qatar                  | 63 | Argentina              | 63 | Uruguay                | 63 | Saint Lucia            | 63 |
| Oman                   | 64 | Oman                   | 64 | United States          | 64 | Malaysia               | 64 |
| Bosnia and Herzegovina | 65 | Malaysia               | 65 | Brunei                 | 65 | Brazil                 | 65 |
| Kyrgyzstan             | 66 | Cyprus                 | 66 | Saudi Arabia           | 66 | Romania                | 66 |
| Brazil                 | 67 | Mongolia               | 67 | Namibia                | 67 | Serbia                 | 67 |
| Trinidad and Tobago    | 68 | Georgia                | 68 | New Zealand            | 68 | Lithuania              | 68 |
| Colombia               | 69 | Albania                | 69 | Vietnam                | 69 | Brunei                 | 69 |
| China                  | 70 | Greece                 | 70 | Georgia                | 70 | Kuwait                 | 70 |
| Barbados               | 71 | Mauritius              | 71 | United Kingdom         | 71 | Vietnam                | 71 |
| Turkey                 | 72 | Trinidad and Tobago    | 72 | Canada                 | 72 | Latvia                 | 72 |
| Brunei                 | 73 | Jordan                 | 73 | Denmark                | 73 | Saudi Arabia           | 73 |
| Ecuador                | 74 | United Arab Emirates   | 74 | Singapore              | 74 | Armenia                | 74 |
| El Salvador            | 75 | Fiji                   | 75 | South Africa           | 75 | Mauritius              | 75 |
| Panama                 | 76 | Gabon                  | 76 | Panama                 | 76 | Bulgaria               | 76 |
| United Arab Emirates   | 77 | Sri Lanka              | 77 | Tunisia                | 77 | Mexico                 | 77 |
| Malaysia               | 78 | Namibia                | 78 | Fiji                   | 78 | Nicaragua              | 78 |

|                       |     |                       |     |                      |     |                       |     |
|-----------------------|-----|-----------------------|-----|----------------------|-----|-----------------------|-----|
| Dominican Republic    | 79  | Botswana              | 79  | Sweden               | 79  | Belarus               | 79  |
| Iran                  | 80  | Mexico                | 80  | Brazil               | 80  | Belize                | 80  |
| Tunisia               | 81  | Tunisia               | 81  | Chile                | 81  | Guatemala             | 81  |
| Albania               | 82  | Turkey                | 82  | Thailand             | 82  | Jordan                | 82  |
| Paraguay              | 83  | Lebanon               | 83  | Bahrain              | 83  | Jamaica               | 83  |
| Algeria               | 84  | Bahrain               | 84  | Kuwait               | 84  | Dominican Republic    | 84  |
| Costa Rica            | 85  | China                 | 85  | Zambia               | 85  | Paraguay              | 85  |
| Peru                  | 86  | Panama                | 86  | Algeria              | 86  | Georgia               | 86  |
| Philippines           | 87  | Thailand              | 87  | Malaysia             | 87  | El Salvador           | 87  |
| Chile                 | 88  | India                 | 88  | Botswana             | 88  | Trinidad and Tobago   | 88  |
| Seychelles            | 89  | Ecuador               | 89  | Colombia             | 89  | Kazakhstan            | 89  |
| Pakistan              | 90  | Sao Tome and Principe | 90  | Jamaica              | 90  | Seychelles            | 90  |
| Bahrain               | 91  | Nepal                 | 91  | Bhutan               | 91  | Bangladesh            | 91  |
| Nicaragua             | 92  | Saint Lucia           | 92  | Zimbabwe             | 92  | Libya                 | 92  |
| Guatemala             | 93  | Belize                | 93  | Oman                 | 93  | Azerbaijan            | 93  |
| Sri Lanka             | 94  | Algeria               | 94  | Peru                 | 94  | Russia                | 94  |
| Iraq                  | 95  | Iraq                  | 95  | Dominican Republic   | 95  | Bhutan                | 95  |
| Fiji                  | 96  | Jamaica               | 96  | Egypt                | 96  | Egypt                 | 96  |
| Belize                | 97  | Gambia                | 97  | Guyana               | 97  | Ukraine               | 97  |
| Vietnam               | 98  | Nigeria               | 98  | Rwanda               | 98  | Bolivia               | 98  |
| South Africa          | 99  | Kenya                 | 99  | Congo                | 99  | Indonesia             | 99  |
| Suriname              | 100 | Iran                  | 100 | Ecuador              | 100 | Moldova               | 100 |
| Egypt                 | 101 | Bhutan                | 101 | Iran                 | 101 | Suriname              | 101 |
| India                 | 102 | Peru                  | 102 | Laos                 | 102 | Uzbekistan            | 102 |
| Morocco               | 103 | Angola                | 103 | Jordan               | 103 | Kyrgyzstan            | 103 |
| Nepal                 | 104 | Vietnam               | 104 | Iraq                 | 104 | Nepal                 | 104 |
| Myanmar               | 105 | Egypt                 | 105 | Djibouti             | 105 | Philippines           | 105 |
| Sao Tome and Principe | 106 | Nicaragua             | 106 | Kenya                | 106 | Iraq                  | 106 |
| Laos                  | 107 | Dominican Republic    | 107 | Mexico               | 107 | Sao Tome and Principe | 107 |
| Bolivia               | 108 | Indonesia             | 108 | Saint Lucia          | 108 | Cambodia              | 108 |
| Jamaica               | 109 | Zimbabwe              | 109 | Belize               | 109 | Mongolia              | 109 |
| Bangladesh            | 110 | Sudan                 | 110 | Paraguay             | 110 | India                 | 110 |
| Thailand              | 111 | Colombia              | 111 | El Salvador          | 111 | Guyana                | 111 |
| Gabon                 | 112 | Paraguay              | 112 | Malawi               | 112 | Rwanda                | 112 |
| Nigeria               | 113 | Bolivia               | 113 | Cameroon             | 113 | Botswana              | 113 |
| Botswana              | 114 | Laos                  | 114 | Qatar                | 114 | Laos                  | 114 |
| Bhutan                | 115 | Cambodia              | 115 | United Arab Emirates | 115 | Senegal               | 115 |
| Namibia               | 116 | Myanmar               | 116 | Costa Rica           | 116 | Madagascar            | 116 |
| Yemen                 | 117 | Ghana                 | 117 | Morocco              | 117 | Fiji                  | 117 |
| Afghanistan           | 118 | Zambia                | 118 | Bolivia              | 118 | Djibouti              | 118 |

|                  |     |                  |     |               |     |                  |     |
|------------------|-----|------------------|-----|---------------|-----|------------------|-----|
| Sudan            | 119 | Morocco          | 119 | Gambia        | 119 | Pakistan         | 119 |
| Djibouti         | 120 | Guatemala        | 120 | Indonesia     | 120 | Myanmar          | 120 |
| Guyana           | 121 | Rwanda           | 121 | Philippines   | 121 | Eritrea          | 121 |
| Kenya            | 122 | Congo            | 122 | Guinea-Bissau | 122 | Kenya            | 122 |
| Indonesia        | 123 | Costa Rica       | 123 | Nicaragua     | 123 | Gabon            | 123 |
| Benin            | 124 | Yemen            | 124 | Myanmar       | 124 | Yemen            | 124 |
| Angola           | 125 | Mauritania       | 125 | Ghana         | 125 | Tanzania         | 125 |
| Cambodia         | 126 | Uganda           | 126 | Somalia       | 126 | Sudan            | 126 |
| Madagascar       | 127 | Burkina Faso     | 127 | Bangladesh    | 127 | Afghanistan      | 127 |
| Gambia           | 128 | Eritrea          | 128 | Cambodia      | 128 | Malawi           | 128 |
| Saint Lucia      | 129 | Benin            | 129 | Sudan         | 129 | Mauritania       | 129 |
| Ghana            | 130 | Djibouti         | 130 | Liberia       | 130 | Papua New Guinea | 130 |
| Congo            | 131 | Guinea-Bissau    | 131 | Burundi       | 131 | Congo            | 131 |
| Uganda           | 132 | Papua New Guinea | 132 | Angola        | 132 | Liberia          | 132 |
| Zambia           | 133 | Guyana           | 133 | Eritrea       | 133 | Ghana            | 133 |
| Mali             | 134 | Cameroon         | 134 | Yemen         | 134 | South Africa     | 134 |
| Cameroon         | 135 | Pakistan         | 135 | Tanzania      | 135 | Namibia          | 135 |
| Zimbabwe         | 136 | Liberia          | 136 | Mozambique    | 136 | Zambia           | 136 |
| Guinea           | 137 | Mali             | 137 | Togo          | 137 | Uganda           | 137 |
| Mauritania       | 138 | Tanzania         | 138 | Guatemala     | 138 | Niger            | 138 |
| Senegal          | 139 | El Salvador      | 139 | Pakistan      | 139 | Gambia           | 139 |
| Rwanda           | 140 | Mozambique       | 140 | India         | 140 | Burkina Faso     | 140 |
| Papua New Guinea | 141 | Guinea           | 141 | Afghanistan   | 141 | Benin            | 141 |
| Mozambique       | 142 | Afghanistan      | 142 | Uganda        | 142 | Burundi          | 142 |
| Eritrea          | 143 | Sierra Leone     | 143 | Benin         | 143 | Guinea           | 143 |
| Togo             | 144 | Senegal          | 144 | Nigeria       | 144 | Angola           | 144 |
| Burkina Faso     | 145 | Chad             | 145 | Mauritania    | 145 | Zimbabwe         | 145 |
| Guinea-Bissau    | 146 | Malawi           | 146 | Burkina Faso  | 146 | Mozambique       | 146 |
| Chad             | 147 | Togo             | 147 | Sierra Leone  | 147 | Togo             | 147 |
| Somalia          | 148 | Bangladesh       | 148 | Chad          | 148 | Mali             | 148 |
| Burundi          | 149 | Philippines      | 149 | Nepal         | 149 | Cameroon         | 149 |
| Sierra Leone     | 150 | Madagascar       | 150 | Senegal       | 150 | Guinea-Bissau    | 150 |
| Liberia          | 151 | Burundi          | 151 | Niger         | 151 | Somalia          | 151 |
| Tanzania         | 152 | Chile            | 152 | Guinea        | 152 | Sierra Leone     | 152 |
| Malawi           | 153 | Niger            | 153 | Madagascar    | 153 | Nigeria          | 153 |
| Niger            | 154 | Somalia          | 154 | Mali          | 154 | Chad             | 154 |

**Table S2.** Country list corresponding to the index in the horizontal axis of Figure 3.

| Asthma        |       | Diabetes      |       | Breast Cancer  |       | AIDS           |       | Influenza and Pneumonia |       |
|---------------|-------|---------------|-------|----------------|-------|----------------|-------|-------------------------|-------|
| Country       | Index | Country       | Index | Country        | Index | Country        | Index | Country                 | Index |
| Sri Lanka     | 1     | Fiji          | 1     | Grenada        | 1     | Malawi         | 1     | Sierra Leone            | 1     |
| Mali          | 2     | Mauritius     | 2     | Barbados       | 2     | Zimbabwe       | 2     | Nigeria                 | 2     |
| Myanmar       | 3     | Trinidad/Tob. | 3     | Bahamas        | 3     | South Africa   | 3     | Chad                    | 3     |
| Laos          | 4     | Belize        | 4     | Antigua/Bar.   | 4     | Botswana       | 4     | Angola                  | 4     |
| Fiji          | 5     | Grenada       | 5     | Nigeria        | 5     | Cameroon       | 5     | Niger                   | 5     |
| Sierra Leone  | 6     | Guyana        | 6     | Fiji           | 6     | Mozambique     | 6     | Benin                   | 6     |
| Cambodia      | 7     | Bahrain       | 7     | Pakistan       | 7     | Zambia         | 7     | Somalia                 | 7     |
| Chad          | 8     | Equ. Guinea   | 8     | Syria          | 8     | Namibia        | 8     | Togo                    | 8     |
| Timor-Leste   | 9     | Mexico        | 9     | Eritrea        | 9     | Equ. Guinea    | 9     | Gambia                  | 9     |
| Philippines   | 10    | South Africa  | 10    | Uruguay        | 10    | South Sudan    | 10    | Burkina Faso            | 10    |
| Madagascar    | 11    | Jamaica       | 11    | Trinidad/Tob.  | 11    | Guinea-Bissau  | 11    | Guinea-Bissau           | 11    |
| Afghanistan   | 12    | Morocco       | 12    | Afghanistan    | 12    | Congo          | 12    | Guinea                  | 12    |
| Indonesia     | 13    | Tunisia       | 13    | Ethiopia       | 13    | Uganda         | 13    | Ghana                   | 13    |
| Angola        | 14    | Qatar         | 14    | Lebanon        | 14    | Nigeria        | 14    | Cameroon                | 14    |
| Somalia       | 15    | Guatemala     | 15    | Saint Lucia    | 15    | Togo           | 15    | Equ. Guinea             | 15    |
| Togo          | 16    | Botswana      | 16    | Serbia         | 16    | Chad           | 16    | Mauritania              | 16    |
| Sao Tome      | 17    | Saint Lucia   | 17    | Belgium        | 17    | Gabon          | 17    | Burundi                 | 17    |
| Benin         | 18    | Barbados      | 18    | Chad           | 18    | Tanzania       | 18    | Liberia                 | 18    |
| Nepal         | 19    | Venezuela     | 19    | Somalia        | 19    | Kenya          | 19    | South Sudan             | 19    |
| Niger         | 20    | Brunei        | 20    | Croatia        | 20    | Djibouti       | 20    | Philippines             | 20    |
| Guinea        | 21    | Angola        | 21    | Iceland        | 21    | Gambia         | 21    | Eritrea                 | 21    |
| Gambia        | 22    | Indonesia     | 22    | Philippines    | 22    | Angola         | 22    | Sao Tome                | 22    |
| Guinea-Bissau | 23    | Namibia       | 23    | Denmark        | 23    | Liberia        | 23    | Zimbabwe                | 23    |
| Equ. Guinea   | 24    | Antigua/Bar.  | 24    | Argentina      | 24    | Sierra Leone   | 24    | Tanzania                | 24    |
| Cameroon      | 25    | Gabon         | 25    | Cyprus         | 25    | Bahamas        | 25    | Malawi                  | 25    |
| Namibia       | 26    | Suriname      | 26    | Netherlands    | 26    | Guinea         | 26    | Djibouti                | 26    |
| Eritrea       | 27    | Sierra Leone  | 27    | Jamaica        | 27    | Mali           | 27    | Gabon                   | 27    |
| Burundi       | 28    | Mauritania    | 28    | Iraq           | 28    | Ghana          | 28    | Uganda                  | 28    |
| Nigeria       | 29    | Jordan        | 29    | Israel         | 29    | Belize         | 29    | Senegal                 | 29    |
| South Africa  | 30    | Sri Lanka     | 30    | United Kingdom | 30    | Haiti          | 30    | Namibia                 | 30    |
| Zimbabwe      | 31    | Haiti         | 31    | Ireland        | 31    | Burundi        | 31    | Rwanda                  | 31    |
| South Sudan   | 32    | Oman          | 32    | Djibouti       | 32    | Rwanda         | 32    | Peru                    | 32    |
| Haiti         | 33    | Ecuador       | 33    | France         | 33    | Sao Tome       | 33    | Zambia                  | 33    |
| Botswana      | 34    | Djibouti      | 34    | Jordan         | 34    | Dominican Rep. | 34    | Kenya                   | 34    |
| Burkina Faso  | 35    | Bhutan        | 35    | Guyana         | 35    | Jamaica        | 35    | Mozambique              | 35    |

|            |    |                |    |              |    |               |    |              |    |
|------------|----|----------------|----|--------------|----|---------------|----|--------------|----|
| Yemen      | 36 | Paraguay       | 36 | Montenegro   | 36 | Guyana        | 36 | Congo        | 36 |
| Mauritania | 37 | Ghana          | 37 | Russia       | 37 | Mauritania    | 37 | Ethiopia     | 37 |
| Ethiopia   | 38 | Cameroon       | 38 | Egypt        | 38 | Somalia       | 38 | Grenada      | 38 |
| Ghana      | 39 | Nigeria        | 39 | Malta        | 39 | Suriname      | 39 | South Africa | 39 |
| Senegal    | 40 | Benin          | 40 | Hungary      | 40 | Burkina Faso  | 40 | Haiti        | 40 |
| Kazakhstan | 41 | Zimbabwe       | 41 | Mauritius    | 41 | Niger         | 41 | Madagascar   | 41 |
| Syria      | 42 | Philippines    | 42 | Germany      | 42 | Ethiopia      | 42 | Botswana     | 42 |
| India      | 43 | Myanmar        | 43 | Ukraine      | 43 | Benin         | 43 | Mali         | 43 |
| Bangladesh | 44 | Nicaragua      | 44 | Slovenia     | 44 | Russia        | 44 | Bolivia      | 44 |
| Mauritius  | 45 | Iraq           | 45 | South Africa | 45 | Malaysia      | 45 | Laos         | 45 |
| Congo      | 46 | Bangladesh     | 46 | Seychelles   | 46 | Thailand      | 46 | Malaysia     | 46 |
| Uganda     | 47 | Pakistan       | 47 | Slovakia     | 47 | Ukraine       | 47 | Timor-Leste  | 47 |
| Malawi     | 48 | Gambia         | 48 | Benin        | 48 | Senegal       | 48 | Singapore    | 48 |
| Sudan      | 49 | Chad           | 49 | Malaysia     | 49 | Myanmar       | 49 | Thailand     | 49 |
| Liberia    | 50 | Liberia        | 50 | Kenya        | 50 | Trinidad/Tob. | 50 | Seychelles   | 50 |
| Djibouti   | 51 | Guinea-Bissau  | 51 | South Sudan  | 51 | Madagascar    | 51 | Guatemala    | 51 |
| Morocco    | 52 | Laos           | 52 | New Zealand  | 52 | Panama        | 52 | Afghanistan  | 52 |
| Bhutan     | 53 | Burkina Faso   | 53 | Romania      | 53 | Honduras      | 53 | India        | 53 |
| Mozambique | 54 | Panama         | 54 | Luxembourg   | 54 | Cambodia      | 54 | Barbados     | 54 |
| Viet Nam   | 55 | Egypt          | 55 | Cameroon     | 55 | Paraguay      | 55 | Sudan        | 55 |
| Rwanda     | 56 | Kuwait         | 56 | Bulgaria     | 56 | Indonesia     | 56 | Belize       | 56 |
| Tanzania   | 57 | Mali           | 57 | Italy        | 57 | Eritrea       | 57 | Kuwait       | 57 |
| Gabon      | 58 | Algeria        | 58 | Belize       | 58 | Bhutan        | 58 | Cambodia     | 58 |
| Zambia     | 59 | Lebanon        | 59 | Latvia       | 59 | Antigua/Bar.  | 59 | Guyana       | 59 |
| Iran       | 60 | Congo          | 60 | Venezuela    | 60 | Barbados      | 60 | Yemen        | 60 |
| Pakistan   | 61 | El Salvador    | 61 | Indonesia    | 61 | Belarus       | 61 | Argentina    | 61 |
| Thailand   | 62 | Kazakhstan     | 62 | Austria      | 62 | Nepal         | 62 | Saudi Arabia | 62 |
| Seychelles | 63 | Nepal          | 63 | Kazakhstan   | 63 | Viet Nam      | 63 | Nepal        | 63 |
| Kenya      | 64 | Bosnia/Herzeg. | 64 | Morocco      | 64 | Venezuela     | 64 | Myanmar      | 64 |
| Tunisia    | 65 | Cyprus         | 65 | Lithuania    | 65 | Guatemala     | 65 | Bhutan       | 65 |
| Brunei     | 66 | Togo           | 66 | Armenia      | 66 | Sudan         | 66 | Brazil       | 66 |
| Libya      | 67 | Libya          | 67 | Mali         | 67 | Bolivia       | 67 | El Salvador  | 67 |
| Bahrain    | 68 | Bahamas        | 68 | Switzerland  | 68 | Ecuador       | 68 | Fiji         | 68 |
| Malaysia   | 69 | India          | 69 | Algeria      | 69 | El Salvador   | 69 | Pakistan     | 69 |
| Mongolia   | 70 | Brazil         | 70 | Greece       | 70 | Colombia      | 70 | Oman         | 70 |
| Uzbekistan | 71 | Senegal        | 71 | Cuba         | 71 | Mauritius     | 71 | Ecuador      | 71 |
| Belize     | 72 | Yemen          | 72 | Paraguay     | 72 | Laos          | 72 | Suriname     | 72 |
| Algeria    | 73 | Tanzania       | 73 | Canada       | 73 | Brazil        | 73 | Morocco      | 73 |

|                |     |                |     |                |     |               |     |                |     |
|----------------|-----|----------------|-----|----------------|-----|---------------|-----|----------------|-----|
| Maldives       | 74  | Thailand       | 74  | United States  | 74  | Nicaragua     | 74  | Japan          | 74  |
| Trinidad/Tob.  | 75  | Armenia        | 75  | Estonia        | 75  | Uruguay       | 75  | Libya          | 75  |
| Guyana         | 76  | Malawi         | 76  | Moldova        | 76  | Argentina     | 76  | Paraguay       | 76  |
| Lebanon        | 77  | Mozambique     | 77  | Madagascar     | 77  | Peru          | 77  | Tunisia        | 77  |
| Dominican Rep. | 78  | Ethiopia       | 78  | Timor-Leste    | 78  | India         | 78  | Saint Lucia    | 78  |
| Saudi Arabia   | 79  | South Sudan    | 79  | Albania        | 79  | Latvia        | 79  | Cuba           | 79  |
| Egypt          | 80  | Sudan          | 80  | Portugal       | 80  | Georgia       | 80  | Antigua/Bar.   | 80  |
| Antigua/Bar.   | 81  | Uzbekistan     | 81  | Burundi        | 81  | Iran          | 81  | Portugal       | 81  |
| Guatemala      | 82  | Niger          | 82  | Sudan          | 82  | Estonia       | 82  | Egypt          | 82  |
| Turkey         | 83  | Eritrea        | 83  | Yemen          | 83  | Portugal      | 83  | Algeria        | 83  |
| Iraq           | 84  | Dominican Rep. | 84  | Australia      | 84  | Armenia       | 84  | Russia         | 84  |
| Jordan         | 85  | Turkey         | 85  | Burkina Faso   | 85  | Mexico        | 85  | Uruguay        | 85  |
| Nicaragua      | 86  | Guinea         | 86  | Belarus        | 86  | Saint Lucia   | 86  | Indonesia      | 86  |
| Albania        | 87  | Zambia         | 87  | Sweden         | 87  | Costa Rica    | 87  | Bahamas        | 87  |
| El Salvador    | 88  | Viet Nam       | 88  | Togo           | 88  | Azerbaijan    | 88  | Kazakhstan     | 88  |
| Kuwait         | 89  | Cambodia       | 89  | Congo          | 89  | Kyrgyzstan    | 89  | Brunei         | 89  |
| Suriname       | 90  | Afghanistan    | 90  | Czech Republic | 90  | Chile         | 90  | Trinidad/Tob.  | 90  |
| Barbados       | 91  | Burundi        | 91  | Georgia        | 91  | Cuba          | 91  | Nicaragua      | 91  |
| Uruguay        | 92  | Israel         | 92  | Norway         | 92  | Morocco       | 92  | Uzbekistan     | 92  |
| Jamaica        | 93  | Somalia        | 93  | Finland        | 93  | Poland        | 93  | Panama         | 93  |
| Honduras       | 94  | Uganda         | 94  | Brazil         | 94  | Seychelles    | 94  | Romania        | 94  |
| South Korea    | 95  | Rwanda         | 95  | Costa Rica     | 95  | Greece        | 95  | Belgium        | 95  |
| Panama         | 96  | Bolivia        | 96  | Uganda         | 96  | Pakistan      | 96  | Venezuela      | 96  |
| Paraguay       | 97  | Kenya          | 97  | Poland         | 97  | Moldova       | 97  | Sri Lanka      | 97  |
| Serbia         | 98  | Peru           | 98  | Singapore      | 98  | Grenada       | 98  | Dominican Rep. | 98  |
| Azerbaijan     | 99  | Colombia       | 99  | Liberia        | 99  | United States | 99  | Viet Nam       | 99  |
| Saint Lucia    | 100 | Seychelles     | 100 | Kuwait         | 100 | Fiji          | 100 | Syria          | 100 |
| Cyprus         | 101 | Argentina      | 101 | Suriname       | 101 | Yemen         | 101 | United Kingdom | 101 |
| Oman           | 102 | Malaysia       | 102 | Panama         | 102 | Kazakhstan    | 102 | Jordan         | 102 |
| Grenada        | 103 | Timor-Leste    | 103 | Niger          | 103 | Afghanistan   | 103 | Iraq           | 103 |
| Montenegro     | 104 | Chile          | 104 | Spain          | 104 | Oman          | 104 | Moldova        | 104 |
| China          | 105 | Azerbaijan     | 105 | Colombia       | 105 | China         | 105 | Mauritius      | 105 |
| Argentina      | 106 | Serbia         | 106 | Sierra Leone   | 106 | Uzbekistan    | 106 | Bangladesh     | 106 |
| Cuba           | 107 | Portugal       | 107 | Sao Tome       | 107 | Spain         | 107 | Slovakia       | 107 |
| Georgia        | 108 | Iran           | 108 | Dominican Rep. | 108 | Bulgaria      | 108 | Israel         | 108 |
| Venezuela      | 109 | Croatia        | 109 | Brunei         | 109 | Lebanon       | 109 | Bahrain        | 109 |
| Bahamas        | 110 | Georgia        | 110 | Turkey         | 110 | Italy         | 110 | Colombia       | 110 |
| Mexico         | 111 | Saudi Arabia   | 111 | India          | 111 | Romania       | 111 | Chile          | 111 |



|                |     |                |     |                |     |                |     |                |     |
|----------------|-----|----------------|-----|----------------|-----|----------------|-----|----------------|-----|
| Ukraine        | 112 | Czech Republic | 112 | Mauritania     | 112 | Albania        | 112 | South Korea    | 112 |
| Israel         | 113 | Costa Rica     | 113 | Equ. Guinea    | 113 | Montenegro     | 113 | Malta          | 113 |
| Brazil         | 114 | South Korea    | 114 | Guinea-Bissau  | 114 | Canada         | 114 | Iran           | 114 |
| Bosnia/Herzeg. | 115 | Madagascar     | 115 | Bosnia/Herzeg. | 115 | Brunei         | 115 | Norway         | 115 |
| Kyrgyzstan     | 116 | Honduras       | 116 | Ghana          | 116 | Singapore      | 116 | Mexico         | 116 |
| Australia      | 117 | Austria        | 117 | Haiti          | 117 | Tunisia        | 117 | Azerbaijan     | 117 |
| Peru           | 118 | Sao Tome       | 118 | Zimbabwe       | 118 | Sri Lanka      | 118 | Maldives       | 118 |
| Bolivia        | 119 | Uruguay        | 119 | Maldives       | 119 | France         | 119 | Jamaica        | 119 |
| Chile          | 120 | United States  | 120 | Angola         | 120 | Bangladesh     | 120 | Poland         | 120 |
| Estonia        | 121 | Montenegro     | 121 | Chile          | 121 | Luxembourg     | 121 | Denmark        | 121 |
| United Kingdom | 122 | Italy          | 122 | Bahrain        | 122 | Bahrain        | 122 | Honduras       | 122 |
| Russia         | 123 | Maldives       | 123 | Uzbekistan     | 123 | Israel         | 123 | Ireland        | 123 |
| New Zealand    | 124 | Hungary        | 124 | Bangladesh     | 124 | Turkey         | 124 | Mongolia       | 124 |
| Latvia         | 125 | Cuba           | 125 | Thailand       | 125 | Austria        | 125 | Sweden         | 125 |
| Belarus        | 126 | Bulgaria       | 126 | Zambia         | 126 | Lithuania      | 126 | Czech Republic | 126 |
| France         | 127 | Syria          | 127 | Namibia        | 127 | Germany        | 127 | Slovenia       | 127 |
| United States  | 128 | Denmark        | 128 | Myanmar        | 128 | Switzerland    | 128 | United States  | 128 |
| Norway         | 129 | Latvia         | 129 | Tanzania       | 129 | Egypt          | 129 | China          | 129 |
| Costa Rica     | 130 | Malta          | 130 | Kyrgyzstan     | 130 | Belgium        | 130 | Bulgaria       | 130 |
| Spain          | 131 | New Zealand    | 131 | Qatar          | 131 | Malta          | 131 | Netherlands    | 131 |
| Poland         | 132 | Germany        | 132 | Senegal        | 132 | Denmark        | 132 | Turkey         | 132 |
| Ireland        | 133 | Australia      | 133 | Mexico         | 133 | Algeria        | 133 | France         | 133 |
| Lithuania      | 134 | Slovakia       | 134 | Tunisia        | 134 | United Kingdom | 134 | Costa Rica     | 134 |
| Ecuador        | 135 | Canada         | 135 | Japan          | 135 | Serbia         | 135 | Latvia         | 135 |
| Colombia       | 136 | Poland         | 136 | Ecuador        | 136 | Timor-Leste    | 136 | Luxembourg     | 136 |
| Luxembourg     | 137 | China          | 137 | Laos           | 137 | Ireland        | 137 | Iceland        | 137 |
| Finland        | 138 | Sweden         | 138 | Iran           | 138 | New Zealand    | 138 | Kyrgyzstan     | 138 |
| Armenia        | 139 | Kyrgyzstan     | 139 | Nicaragua      | 139 | Qatar          | 139 | Lithuania      | 139 |
| Sweden         | 140 | Spain          | 140 | Sri Lanka      | 140 | Cyprus         | 140 | Albania        | 140 |
| Romania        | 141 | France         | 141 | Cambodia       | 141 | Australia      | 141 | Qatar          | 141 |
| Belgium        | 142 | Netherlands    | 142 | Saudi Arabia   | 142 | South Korea    | 142 | Greece         | 142 |
| Singapore      | 143 | Luxembourg     | 143 | Malawi         | 143 | Syria          | 143 | New Zealand    | 143 |
| Czech Republic | 144 | Moldova        | 144 | Azerbaijan     | 144 | Croatia        | 144 | Germany        | 144 |
| Germany        | 145 | Norway         | 145 | Libya          | 145 | Netherlands    | 145 | Georgia        | 145 |
| Japan          | 146 | Ireland        | 146 | Oman           | 146 | Norway         | 146 | Spain          | 146 |
| Malta          | 147 | Slovenia       | 147 | Nepal          | 147 | Mongolia       | 147 | Switzerland    | 147 |
| Qatar          | 148 | Switzerland    | 148 | Rwanda         | 148 | Sweden         | 148 | Estonia        | 148 |
| Hungary        | 149 | Belgium        | 149 | El Salvador    | 149 | Philippines    | 149 | Armenia        | 149 |

| Croatia       | 150   | Romania        | 150   | Honduras       | 150   | Hungary                | 150   | Australia      | 150   |
|---------------|-------|----------------|-------|----------------|-------|------------------------|-------|----------------|-------|
| Switzerland   | 151   | Estonia        | 151   | Peru           | 151   | Czech Republic         | 151   | Canada         | 151   |
| Portugal      | 152   | Lithuania      | 152   | Botswana       | 152   | Finland                | 152   | Ukraine        | 152   |
| Slovenia      | 153   | Mongolia       | 153   | Mozambique     | 153   | Bosnia/Herzeg.         | 153   | Lebanon        | 153   |
| Slovakia      | 154   | Greece         | 154   | Guinea         | 154   | Slovenia               | 154   | Serbia         | 154   |
| Denmark       | 155   | Finland        | 155   | Bolivia        | 155   | Jordan                 | 155   | Cyprus         | 155   |
| Moldova       | 156   | United Kingdom | 156   | Guatemala      | 156   | Japan                  | 156   | Italy          | 156   |
| Canada        | 157   | Russia         | 157   | Gabon          | 157   | Slovakia               | 157   | Bosnia/Herzeg. | 157   |
| Austria       | 158   | Iceland        | 158   | Viet Nam       | 158   | Maldives               | 158   | Croatia        | 158   |
| Iceland       | 159   | Singapore      | 159   | South Korea    | 159   | Kuwait                 | 159   | Montenegro     | 159   |
| Netherlands   | 160   | Japan          | 160   | China          | 160   | Iraq                   | 160   | Hungary        | 160   |
| Greece        | 161   | Ukraine        | 161   | Gambia         | 161   | Saudi Arabia           | 161   | Belarus        | 161   |
| Bulgaria      | 162   | Albania        | 162   | Mongolia       | 162   | Libya                  | 162   | Austria        | 162   |
| Italy         | 163   | Belarus        | 163   | Bhutan         | 163   | Iceland                | 163   | Finland        | 163   |
| Tuberculosis  |       | Stroke         |       | Smoke          |       | Coronary Heart Disease |       | Hypertension   |       |
| Country       | Index | Country        | Index | Country        | Index | Country                | Index | Country        | Index |
| Nigeria       | 1     | Indonesia      | 1     | Myanmar        | 1     | Ukraine                | 1     | Seychelles     | 1     |
| Liberia       | 2     | Sierra Leone   | 2     | Montenegro     | 2     | Kyrgyzstan             | 2     | Uzbekistan     | 2     |
| Guinea-Bissau | 3     | Mongolia       | 3     | Ukraine        | 3     | Belarus                | 3     | Guyana         | 3     |
| Timor-Leste   | 4     | Russia         | 4     | Serbia         | 4     | Uzbekistan             | 4     | Madagascar     | 4     |
| Sierra Leone  | 5     | Montenegro     | 5     | Azerbaijan     | 5     | Moldova                | 5     | Burundi        | 5     |
| Mozambique    | 6     | Yemen          | 6     | Bosnia/Herzeg. | 6     | Yemen                  | 6     | Jordan         | 6     |
| Somalia       | 7     | Ghana          | 7     | Bulgaria       | 7     | Azerbaijan             | 7     | Angola         | 7     |
| Tanzania      | 8     | Myanmar        | 8     | Laos           | 8     | Russia                 | 8     | Bulgaria       | 8     |
| Angola        | 9     | Afghanistan    | 9     | Philippines    | 9     | Afghanistan            | 9     | Belize         | 9     |
| Gabon         | 10    | Georgia        | 10    | Zimbabwe       | 10    | Syria                  | 10    | Georgia        | 10    |
| Afghanistan   | 11    | Togo           | 11    | Mongolia       | 11    | Pakistan               | 11    | Haiti          | 11    |
| Congo         | 12    | Angola         | 12    | Belarus        | 12    | Mongolia               | 12    | Iran           | 12    |
| Laos          | 13    | Benin          | 13    | Russia         | 13    | Lithuania              | 13    | Mozambique     | 13    |
| Madagascar    | 14    | Guyana         | 14    | Cambodia       | 14    | Georgia                | 14    | Uganda         | 14    |
| Cambodia      | 15    | Haiti          | 15    | Pakistan       | 15    | Sudan                  | 15    | Eritrea        | 15    |
| Ghana         | 16    | Mali           | 16    | Hungary        | 16    | Egypt                  | 16    | Rwanda         | 16    |
| Zambia        | 17    | Kyrgyzstan     | 17    | Nepal          | 17    | Iraq                   | 17    | South Africa   | 17    |
| Guinea        | 18    | Gambia         | 18    | Egypt          | 18    | Lebanon                | 18    | Malawi         | 18    |
| Bangladesh    | 19    | Sudan          | 19    | Fiji           | 19    | Armenia                | 19    | Equ. Guinea    | 19    |
| South Africa  | 20    | Cameroon       | 20    | China          | 20    | Romania                | 20    | Bahamas        | 20    |
| Namibia       | 21    | Philippines    | 21    | Kazakhstan     | 21    | Bulgaria               | 21    | Grenada        | 21    |
| Djibouti      | 22    | Chad           | 22    | Armenia        | 22    | Guyana                 | 22    | Botswana       | 22    |

|              |    |                |    |                |    |                |    |               |    |
|--------------|----|----------------|----|----------------|----|----------------|----|---------------|----|
| Myanmar      | 23 | Bulgaria       | 23 | Indonesia      | 23 | Latvia         | 23 | Kuwait        | 23 |
| Cameroon     | 24 | China          | 24 | Georgia        | 24 | Kuwait         | 24 | Burkina Faso  | 24 |
| Chad         | 25 | Bangladesh     | 25 | Lebanon        | 25 | Libya          | 25 | Antigua/Bar.  | 25 |
| Burundi      | 26 | Guinea-Bissau  | 26 | Moldova        | 26 | Philippines    | 26 | South Sudan   | 26 |
| South Sudan  | 27 | Madagascar     | 27 | Romania        | 27 | Sierra Leone   | 27 | Namibia       | 27 |
| Indonesia    | 28 | Laos           | 28 | Timor-Leste    | 28 | Kazakhstan     | 28 | Myanmar       | 28 |
| Botswana     | 29 | Eritrea        | 29 | Poland         | 29 | Hungary        | 29 | Tanzania      | 29 |
| Senegal      | 30 | Moldova        | 30 | Latvia         | 30 | Estonia        | 30 | Gabon         | 30 |
| Ethiopia     | 31 | Suriname       | 31 | Croatia        | 31 | Saudi Arabia   | 31 | Ecuador       | 31 |
| Gambia       | 32 | Nigeria        | 32 | Brunei         | 32 | Iran           | 32 | Ethiopia      | 32 |
| India        | 33 | Senegal        | 33 | Yemen          | 33 | Burkina Faso   | 33 | Somalia       | 33 |
| Philippines  | 34 | Cambodia       | 34 | Lithuania      | 34 | Laos           | 34 | Fiji          | 34 |
| Niger        | 35 | Ukraine        | 35 | Greece         | 35 | Haiti          | 35 | Djibouti      | 35 |
| Kenya        | 36 | Belarus        | 36 | Malaysia       | 36 | Fiji           | 36 | Congo         | 36 |
| Mauritania   | 37 | Guinea         | 37 | Viet Nam       | 37 | Nepal          | 37 | Saint Lucia   | 37 |
| Pakistan     | 38 | Viet Nam       | 38 | Uzbekistan     | 38 | Slovakia       | 38 | Philippines   | 38 |
| Sudan        | 39 | Niger          | 39 | Albania        | 39 | Ghana          | 39 | Jamaica       | 39 |
| Uganda       | 40 | Sao Tome       | 40 | Czech Republic | 40 | Trinidad/Tob.  | 40 | Moldova       | 40 |
| Mongolia     | 41 | Equ. Guinea    | 41 | Cuba           | 41 | Czech Republic | 41 | Kenya         | 41 |
| Malawi       | 42 | Mauritania     | 42 | Denmark        | 42 | Grenada        | 42 | Sierra Leone  | 42 |
| Eritrea      | 43 | Mozambique     | 43 | Argentina      | 43 | Bhutan         | 43 | Zambia        | 43 |
| Nepal        | 44 | Romania        | 44 | Tunisia        | 44 | Benin          | 44 | Romania       | 44 |
| Haiti        | 45 | Liberia        | 45 | India          | 45 | Croatia        | 45 | Ghana         | 45 |
| Zimbabwe     | 46 | Syria          | 46 | Mozambique     | 46 | Poland         | 46 | Trinidad/Tob. | 46 |
| Mali         | 47 | Albania        | 47 | Slovakia       | 47 | Montenegro     | 47 | Mauritius     | 47 |
| Burkina Faso | 48 | Latvia         | 48 | Afghanistan    | 48 | India          | 48 | Estonia       | 48 |
| Bhutan       | 49 | Azerbaijan     | 49 | Namibia        | 49 | Togo           | 49 | Suriname      | 49 |
| Benin        | 50 | Gabon          | 50 | Uruguay        | 50 | Cambodia       | 50 | China         | 50 |
| Viet Nam     | 51 | Bosnia/Herzeg. | 51 | Turkey         | 51 | Mali           | 51 | Laos          | 51 |
| Guyana       | 52 | Timor-Leste    | 52 | Kyrgyzstan     | 52 | Gambia         | 52 | Yemen         | 52 |
| Libya        | 53 | Congo          | 53 | Netherlands    | 53 | Indonesia      | 53 | Afghanistan   | 53 |
| Kyrgyzstan   | 54 | Burundi        | 54 | Angola         | 54 | Malaysia       | 54 | Hungary       | 54 |
| Equ. Guinea  | 55 | Pakistan       | 55 | Dominican Rep. | 55 | Bahrain        | 55 | Sudan         | 55 |
| Kazakhstan   | 56 | Tunisia        | 56 | Paraguay       | 56 | Jordan         | 56 | India         | 56 |
| Togo         | 57 | Botswana       | 57 | Seychelles     | 57 | Dominican Rep. | 57 | Venezuela     | 57 |
| Ukraine      | 58 | Egypt          | 58 | Belgium        | 58 | Guinea-Bissau  | 58 | Cambodia      | 58 |
| Morocco      | 59 | Burkina Faso   | 59 | Rwanda         | 59 | Angola         | 59 | Togo          | 59 |
| Russia       | 60 | Iraq           | 60 | Suriname       | 60 | Oman           | 60 | Mali          | 60 |

|                |    |                |    |                |    |                |    |                |    |
|----------------|----|----------------|----|----------------|----|----------------|----|----------------|----|
| Uzbekistan     | 61 | Grenada        | 61 | Estonia        | 61 | Sri Lanka      | 61 | Serbia         | 61 |
| Thailand       | 62 | South Africa   | 62 | Syria          | 62 | Equ. Guinea    | 62 | Turkey         | 62 |
| Malaysia       | 63 | Djibouti       | 63 | Somalia        | 63 | Venezuela      | 63 | Nigeria        | 63 |
| Algeria        | 64 | Uganda         | 64 | Bangladesh     | 64 | Mauritania     | 64 | Nepal          | 64 |
| Brunei         | 65 | Namibia        | 65 | Cyprus         | 65 | Albania        | 65 | Egypt          | 65 |
| Sao Tome       | 66 | Somalia        | 66 | Zambia         | 66 | Chad           | 66 | Cameroon       | 66 |
| Fiji           | 67 | Kazakhstan     | 67 | Ireland        | 67 | Morocco        | 67 | Barbados       | 67 |
| Maldives       | 68 | Ethiopia       | 68 | United States  | 68 | Cameroon       | 68 | Dominican Rep. | 68 |
| Yemen          | 69 | Saudi Arabia   | 69 | Jamaica        | 69 | Belize         | 69 | Pakistan       | 69 |
| Rwanda         | 70 | Libya          | 70 | Brazil         | 70 | Bosnia/Herzeg. | 70 | Armenia        | 70 |
| Belarus        | 71 | South Sudan    | 71 | Botswana       | 71 | Timor-Leste    | 71 | Indonesia      | 71 |
| Peru           | 72 | Lithuania      | 72 | Germany        | 72 | Serbia         | 72 | Gambia         | 72 |
| Panama         | 73 | Uzbekistan     | 73 | Gambia         | 73 | Suriname       | 73 | Benin          | 73 |
| Belize         | 74 | Iran           | 74 | Sierra Leone   | 74 | Nigeria        | 74 | Chad           | 74 |
| Moldova        | 75 | Kuwait         | 75 | Canada         | 75 | Niger          | 75 | Algeria        | 75 |
| Iraq           | 76 | Armenia        | 76 | Honduras       | 76 | Namibia        | 76 | Nicaragua      | 76 |
| Dominican Rep. | 77 | Rwanda         | 77 | Mauritius      | 77 | Guinea         | 77 | Paraguay       | 77 |
| Sri Lanka      | 78 | Serbia         | 78 | South Africa   | 78 | Mauritius      | 78 | Bhutan         | 78 |
| Saudi Arabia   | 79 | Saint Lucia    | 79 | Tanzania       | 79 | South Africa   | 79 | Guinea         | 79 |
| Paraguay       | 80 | Nepal          | 80 | United Kingdom | 80 | Seychelles     | 80 | Timor-Leste    | 80 |
| Lithuania      | 81 | Belize         | 81 | Slovenia       | 81 | Greece         | 81 | Iraq           | 81 |
| Ecuador        | 82 | Jordan         | 82 | Malta          | 82 | Senegal        | 82 | Niger          | 82 |
| South Korea    | 83 | Morocco        | 83 | South Sudan    | 83 | Maldives       | 83 | Guinea-Bissau  | 83 |
| Romania        | 84 | Jamaica        | 84 | Djibouti       | 84 | Liberia        | 84 | Honduras       | 84 |
| Bolivia        | 85 | Paraguay       | 85 | Luxembourg     | 85 | Algeria        | 85 | Chile          | 85 |
| Nicaragua      | 86 | Tanzania       | 86 | Burundi        | 86 | Bangladesh     | 86 | Latvia         | 86 |
| Georgia        | 87 | Croatia        | 87 | Congo          | 87 | Turkey         | 87 | Senegal        | 87 |
| Guatemala      | 88 | Trinidad/Tob.  | 88 | Guyana         | 88 | Honduras       | 88 | Morocco        | 88 |
| Colombia       | 89 | Algeria        | 89 | Jordan         | 89 | Botswana       | 89 | Liberia        | 89 |
| Venezuela      | 90 | Sri Lanka      | 90 | Spain          | 90 | Tunisia        | 90 | Colombia       | 90 |
| Suriname       | 91 | Fiji           | 91 | Maldives       | 91 | Argentina      | 91 | Austria        | 91 |
| Latvia         | 92 | Malawi         | 92 | Austria        | 92 | Ethiopia       | 92 | Croatia        | 92 |
| Brazil         | 93 | Malaysia       | 93 | Haiti          | 93 | Malta          | 93 | Mauritania     | 93 |
| Armenia        | 94 | India          | 94 | Libya          | 94 | El Salvador    | 94 | Argentina      | 94 |
| Mexico         | 95 | Dominican Rep. | 95 | Gabon          | 95 | Congo          | 95 | Sri Lanka      | 95 |
| Iran           | 96 | Barbados       | 96 | Algeria        | 96 | Qatar          | 96 | Viet Nam       | 96 |
| China          | 97 | Kenya          | 97 | Norway         | 97 | Paraguay       | 97 | Libya          | 97 |
| Tunisia        | 98 | Bhutan         | 98 | Iran           | 98 | Cuba           | 98 | Brazil         | 98 |

|                |     |                |     |               |     |               |     |                |     |
|----------------|-----|----------------|-----|---------------|-----|---------------|-----|----------------|-----|
| Chile          | 99  | Greece         | 99  | Venezuela     | 99  | Nicaragua     | 99  | Cuba           | 99  |
| Honduras       | 100 | Zambia         | 100 | Morocco       | 100 | China         | 100 | Costa Rica     | 100 |
| El Salvador    | 101 | Zimbabwe       | 101 | Thailand      | 101 | Gabon         | 101 | Italy          | 101 |
| Trinidad/Tob.  | 102 | Bolivia        | 102 | Iceland       | 102 | Colombia      | 102 | Panama         | 102 |
| Bosnia/Herzeg. | 103 | Poland         | 103 | Sweden        | 103 | Sao Tome      | 103 | Zimbabwe       | 103 |
| Saint Lucia    | 104 | Thailand       | 104 | South Korea   | 104 | Austria       | 104 | Kyrgyzstan     | 104 |
| Estonia        | 105 | Turkey         | 105 | France        | 105 | Eritrea       | 105 | Bangladesh     | 105 |
| Argentina      | 106 | Hungary        | 106 | Grenada       | 106 | Bolivia       | 106 | Cyprus         | 106 |
| Uruguay        | 107 | Lebanon        | 107 | Trinidad/Tob. | 107 | Mexico        | 107 | Slovakia       | 107 |
| Mauritius      | 108 | Seychelles     | 108 | Italy         | 108 | Cyprus        | 108 | Switzerland    | 108 |
| Bahrain        | 109 | Venezuela      | 109 | Malawi        | 109 | Madagascar    | 109 | Germany        | 109 |
| Qatar          | 110 | Slovakia       | 110 | Sri Lanka     | 110 | Antigua/Bar.  | 110 | Mongolia       | 110 |
| Portugal       | 111 | Mauritius      | 111 | Saint Lucia   | 111 | United States | 111 | El Salvador    | 111 |
| Costa Rica     | 112 | Brazil         | 112 | Madagascar    | 112 | Djibouti      | 112 | Slovenia       | 112 |
| Lebanon        | 113 | Honduras       | 113 | Bhutan        | 113 | Bahamas       | 113 | Mexico         | 113 |
| Oman           | 114 | Nicaragua      | 114 | Iraq          | 114 | Finland       | 114 | Singapore      | 114 |
| Turkey         | 115 | Antigua/Bar.   | 115 | New Zealand   | 115 | Slovenia      | 115 | Czech Republic | 115 |
| Bulgaria       | 116 | Portugal       | 116 | Switzerland   | 116 | Tanzania      | 116 | Lebanon        | 116 |
| Poland         | 117 | Cuba           | 117 | Israel        | 117 | Malawi        | 117 | Tunisia        | 117 |
| Japan          | 118 | Brunei         | 118 | Japan         | 118 | Zambia        | 118 | Guatemala      | 118 |
| Serbia         | 119 | Maldives       | 119 | Belize        | 119 | Guatemala     | 119 | United States  | 119 |
| Singapore      | 120 | Bahamas        | 120 | Oman          | 120 | Germany       | 120 | Uruguay        | 120 |
| Grenada        | 121 | Uruguay        | 121 | Portugal      | 121 | Iceland       | 121 | Azerbaijan     | 121 |
| Iceland        | 122 | Oman           | 122 | Australia     | 122 | Brunei        | 122 | Greece         | 122 |
| Bahamas        | 123 | Argentina      | 123 | Liberia       | 123 | Brazil        | 123 | Kazakhstan     | 123 |
| Jordan         | 124 | Czech Republic | 124 | Kenya         | 124 | Burundi       | 124 | Finland        | 124 |
| Hungary        | 125 | Panama         | 125 | Bolivia       | 125 | Myanmar       | 125 | Sweden         | 125 |
| Antigua/Bar.   | 126 | Slovenia       | 126 | Eritrea       | 126 | Mozambique    | 126 | Lithuania      | 126 |
| Kuwait         | 127 | Guatemala      | 127 | Mexico        | 127 | Zimbabwe      | 127 | Poland         | 127 |
| Slovenia       | 128 | Chile          | 128 | Cameroon      | 128 | Rwanda        | 128 | Spain          | 128 |
| Greece         | 129 | Bahrain        | 129 | Bahrain       | 129 | Sweden        | 129 | Russia         | 129 |
| Croatia        | 130 | Colombia       | 130 | Benin         | 130 | Barbados      | 130 | Belarus        | 130 |
| France         | 131 | Peru           | 131 | Finland       | 131 | Peru          | 131 | Ukraine        | 131 |
| Austria        | 132 | Ecuador        | 132 | Costa Rica    | 132 | South Sudan   | 132 | Bahrain        | 132 |
| Azerbaijan     | 133 | Italy          | 133 | Chile         | 133 | Saint Lucia   | 133 | Syria          | 133 |
| Jamaica        | 134 | Estonia        | 134 | Guinea-Bissau | 134 | Panama        | 134 | Portugal       | 134 |
| Italy          | 135 | South Korea    | 135 | Togo          | 135 | Costa Rica    | 135 | Israel         | 135 |
| Spain          | 136 | Finland        | 136 | Uganda        | 136 | New Zealand   | 136 | Sao Tome       | 136 |

|                |     |                |     |              |     |                |     |                |     |
|----------------|-----|----------------|-----|--------------|-----|----------------|-----|----------------|-----|
| Slovakia       | 137 | Japan          | 137 | Bahamas      | 137 | Ireland        | 137 | Bosnia/Herzeg. | 137 |
| Finland        | 138 | Mexico         | 138 | Guinea       | 138 | Thailand       | 138 | South Korea    | 138 |
| Belgium        | 139 | Cyprus         | 139 | Kuwait       | 139 | Uruguay        | 139 | Maldives       | 139 |
| Egypt          | 140 | New Zealand    | 140 | Ghana        | 140 | Viet Nam       | 140 | Oman           | 140 |
| Czech Republic | 141 | Malta          | 141 | Sao Tome     | 141 | Somalia        | 141 | Denmark        | 141 |
| Albania        | 142 | Qatar          | 142 | Equ. Guinea  | 142 | Uganda         | 142 | Saudi Arabia   | 142 |
| United Kingdom | 143 | El Salvador    | 143 | El Salvador  | 143 | Italy          | 143 | Bolivia        | 143 |
| Montenegro     | 144 | Costa Rica     | 144 | Panama       | 144 | Jamaica        | 144 | Iceland        | 144 |
| Cuba           | 145 | Norway         | 145 | Antigua/Bar. | 145 | Norway         | 145 | Brunei         | 145 |
| Ireland        | 146 | Belgium        | 146 | Qatar        | 146 | Singapore      | 146 | Peru           | 146 |
| Norway         | 147 | Sweden         | 147 | Guatemala    | 147 | Switzerland    | 147 | France         | 147 |
| Cyprus         | 148 | Netherlands    | 148 | Burkina Faso | 148 | Belgium        | 148 | Thailand       | 148 |
| Denmark        | 149 | United Kingdom | 149 | Colombia     | 149 | Ecuador        | 149 | Luxembourg     | 149 |
| Germany        | 150 | Denmark        | 150 | Singapore    | 150 | Luxembourg     | 150 | Australia      | 150 |
| New Zealand    | 151 | Iceland        | 151 | Saudi Arabia | 151 | United Kingdom | 151 | Norway         | 151 |
| Israel         | 152 | Ireland        | 152 | Mali         | 152 | Canada         | 152 | Albania        | 152 |
| Canada         | 153 | Luxembourg     | 153 | Barbados     | 153 | Australia      | 153 | Malaysia       | 153 |
| Syria          | 154 | Germany        | 154 | Senegal      | 154 | Netherlands    | 154 | New Zealand    | 154 |
| Switzerland    | 155 | Spain          | 155 | Nicaragua    | 155 | Spain          | 155 | Ireland        | 155 |
| Barbados       | 156 | Austria        | 156 | Ecuador      | 156 | Chile          | 156 | Netherlands    | 156 |
| Sweden         | 157 | Australia      | 157 | Chad         | 157 | Portugal       | 157 | United Kingdom | 157 |
| United States  | 158 | United States  | 158 | Mauritania   | 158 | Israel         | 158 | Montenegro     | 158 |
| Netherlands    | 159 | Singapore      | 159 | Ethiopia     | 159 | Denmark        | 159 | Belgium        | 159 |
| Australia      | 160 | France         | 160 | Niger        | 160 | Kenya          | 160 | Canada         | 160 |
| Malta          | 161 | Israel         | 161 | Peru         | 161 | France         | 161 | Qatar          | 161 |
| Luxembourg     | 162 | Switzerland    | 162 | Nigeria      | 162 | Japan          | 162 | Malta          | 162 |
| Seychelles     | 163 | Canada         | 163 | Sudan        | 163 | South Korea    | 163 | Japan          | 163 |

**Table S3.** Country list corresponding to the index in the horizontal axis of Figure 4.

| Prevalence of Asthma |       | Prevalence of Diabetes |       | Prevalence of Breast Cancer |       | Prevalence of AIDS |       |
|----------------------|-------|------------------------|-------|-----------------------------|-------|--------------------|-------|
| Country              | Index | Country                | Index | Country                     | Index | Country            | Index |
| Papua New Guinea     | 1     | New Caledonia          | 1     | China                       | 1     | Botswana           | 1     |
| Australia            | 2     | French Polynesia       | 2     | United States               | 2     | South Africa       | 2     |
| Fiji                 | 3     | Mauritius              | 3     | India                       | 3     | Zimbabwe           | 3     |
| United Kingdom       | 4     | Saudi Arabia           | 4     | Japan                       | 4     | Mozambique         | 4     |
| Bermuda              | 5     | Papua New Guinea       | 5     | Germany                     | 5     | Namibia            | 5     |
| Iceland              | 6     | Egypt                  | 6     | Russia                      | 6     | Zambia             | 6     |
| Portugal             | 7     | United Arab Emirates   | 7     | United Kingdom              | 7     | Malawi             | 7     |
| Sweden               | 8     | Belize                 | 8     | Italy                       | 8     | Equatorial Guinea  | 8     |
| Trinidad and Tobago  | 9     | Malaysia               | 9     | France                      | 9     | Uganda             | 9     |
| Norway               | 10    | Bahrain                | 10    | Brazil                      | 10    | Kenya              | 10    |
| New Zealand          | 11    | Qatar                  | 11    | Indonesia                   | 11    | Tanzania           | 11    |
| Ireland              | 12    | Kuwait                 | 12    | Pakistan                    | 12    | Gabon              | 12    |
| Suriname             | 13    | Sudan                  | 13    | Spain                       | 13    | Cameroon           | 13    |
| Cuba                 | 14    | Fiji                   | 14    | Canada                      | 14    | Guinea-Bissau      | 14    |
| Bahamas              | 15    | British Virgin Islands | 15    | Mexico                      | 15    | Congo              | 15    |
| Belize               | 16    | Barbados               | 16    | Nigeria                     | 16    | Nigeria            | 16    |
| Grenada              | 17    | Cayman Islands         | 17    | Philippines                 | 17    | Rwanda             | 17    |
| Saint Lucia          | 18    | Antigua and Barbuda    | 18    | South Korea                 | 18    | South Sudan        | 18    |
| Jamaica              | 19    | Bahamas                | 19    | Poland                      | 19    | Togo               | 19    |
| Antigua and Barbuda  | 20    | Mexico                 | 20    | Ukraine                     | 20    | Angola             | 20    |
| Lebanon              | 21    | Bermuda                | 21    | Thailand                    | 21    | Bahamas            | 21    |
| Dominica             | 22    | Saint Kitts and Nevis  | 22    | Turkey                      | 22    | Belize             | 22    |
| United Arab Emirates | 23    | Brunei                 | 23    | Netherlands                 | 23    | Haiti              | 23    |
| Guyana               | 24    | Lebanon                | 24    | Australia                   | 24    | Jamaica            | 24    |
| Luxembourg           | 25    | Oman                   | 25    | Iran                        | 25    | Ghana              | 25    |
| Netherlands          | 26    | Suriname               | 26    | Argentina                   | 26    | Guyana             | 26    |
| Haiti                | 27    | Turkey                 | 27    | Vietnam                     | 27    | Barbados           | 27    |
| Barbados             | 28    | Jordan                 | 28    | Bangladesh                  | 28    | Gambia             | 28    |
| Jordan               | 29    | Aruba                  | 29    | Taiwan                      | 29    | Guinea             | 29    |
| Egypt                | 30    | Curacao                | 30    | Myanmar                     | 30    | Liberia            | 30    |
| Andorra              | 31    | Dominica               | 31    | Colombia                    | 31    | Sierra Leone       | 31    |
| France               | 32    | Guyana                 | 32    | Egypt                       | 32    | Chad               | 32    |
| Kuwait               | 33    | Saint Lucia            | 33    | Belgium                     | 33    | Djibouti           | 33    |
| Greenland            | 34    | Nicaragua              | 34    | Romania                     | 34    | Suriname           | 34    |

|                    |    |                        |    |                |    |                     |    |
|--------------------|----|------------------------|----|----------------|----|---------------------|----|
| Philippines        | 35 | Jamaica                | 35 | Sweden         | 35 | Mali                | 35 |
| Bolivia            | 36 | Singapore              | 36 | Greece         | 36 | Russia              | 36 |
| Paraguay           | 37 | Trinidad and Tobago    | 37 | Morocco        | 37 | Burundi             | 37 |
| Afghanistan        | 38 | United States          | 38 | Malaysia       | 38 | Thailand            | 38 |
| Finland            | 39 | Grenada                | 39 | Venezuela      | 39 | Trinidad and Tobago | 39 |
| Switzerland        | 40 | Sri Lanka              | 40 | Portugal       | 40 | Benin               | 40 |
| Algeria            | 41 | Palestine              | 41 | South Africa   | 41 | Panama              | 41 |
| Malta              | 42 | Seychelles             | 42 | Algeria        | 42 | Dominican Republic  | 42 |
| Congo              | 43 | Libya                  | 43 | Switzerland    | 43 | Ethiopia            | 43 |
| Palestine          | 44 | South Sudan            | 44 | Austria        | 44 | Papua New Guinea    | 44 |
| Mauritius          | 45 | India                  | 45 | Czech Republic | 45 | Ukraine             | 45 |
| Costa Rica         | 46 | Guatemala              | 46 | Hungary        | 46 | Burkina Faso        | 46 |
| Canada             | 47 | Albania                | 47 | Saudi Arabia   | 47 | Estonia             | 47 |
| Dominican Republic | 48 | Bosnia and Herzegovina | 48 | Ethiopia       | 48 | Myanmar             | 48 |
| Rwanda             | 49 | Montenegro             | 49 | Serbia         | 49 | Brazil              | 49 |
| Uruguay            | 50 | Serbia                 | 50 | Chile          | 50 | Chile               | 50 |
| Denmark            | 51 | Portugal               | 51 | Cuba           | 51 | El Salvador         | 51 |
| Iraq               | 52 | Bhutan                 | 52 | Lebanon        | 52 | Eritrea             | 52 |
| Gabon              | 53 | China                  | 53 | Uzbekistan     | 53 | Moldova             | 53 |
| Sudan              | 54 | Romania                | 54 | Finland        | 54 | Portugal            | 54 |
| Cyprus             | 55 | Afghanistan            | 55 | Denmark        | 55 | Uruguay             | 55 |
| Israel             | 56 | Iran                   | 56 | Bulgaria       | 56 | Cambodia            | 56 |
| Tanzania           | 57 | Cyprus                 | 57 | Israel         | 57 | Colombia            | 57 |
| Equatorial Guinea  | 58 | Maldives               | 58 | Peru           | 58 | France              | 58 |
| Libya              | 59 | El Salvador            | 59 | Sri Lanka      | 59 | Paraguay            | 59 |
| United States      | 60 | Iraq                   | 60 | Kazakhstan     | 60 | Argentina           | 60 |
| Thailand           | 61 | Malta                  | 61 | Iraq           | 61 | Belarus             | 61 |
| Bahrain            | 62 | Costa Rica             | 62 | Belarus        | 62 | Costa Rica          | 62 |
| Panama             | 63 | Tunisia                | 63 | Ireland        | 63 | Cuba                | 63 |
| Austria            | 64 | Chile                  | 64 | Norway         | 64 | Georgia             | 64 |
| Greece             | 65 | Bangladesh             | 65 | New Zealand    | 65 | Guatemala           | 65 |
| Sri Lanka          | 66 | Pakistan               | 66 | Tanzania       | 66 | Indonesia           | 66 |
| Indonesia          | 67 | Hong Kong              | 67 | Tunisia        | 67 | Malaysia            | 67 |
| El Salvador        | 68 | Panama                 | 68 | Kenya          | 68 | Senegal             | 68 |
| Spain              | 69 | Germany                | 69 | Slovakia       | 69 | Spain               | 69 |
| Syria              | 70 | Cuba                   | 70 | Croatia        | 70 | Bolivia             | 70 |
| Peru               | 71 | Paraguay               | 71 | Ghana          | 71 | Ecuador             | 71 |
| Angola             | 72 | Dominican Republic     | 72 | Syria          | 72 | Honduras            | 72 |



|                        |     |                   |     |                        |     |                |     |
|------------------------|-----|-------------------|-----|------------------------|-----|----------------|-----|
| Turkey                 | 73  | Brazil            | 73  | Singapore              | 73  | Laos           | 73  |
| Seychelles             | 74  | New Zealand       | 74  | Nepal                  | 74  | Luxembourg     | 74  |
| Laos                   | 75  | Andorra           | 75  | Ecuador                | 75  | Madagascar     | 75  |
| Honduras               | 76  | Equatorial Guinea | 76  | Azerbaijan             | 76  | Mauritania     | 76  |
| Chile                  | 77  | Liechtenstein     | 77  | Sudan                  | 77  | Mexico         | 77  |
| Ecuador                | 78  | Uzbekistan        | 78  | Dominican Republic     | 78  | Niger          | 78  |
| Maldives               | 79  | Hungary           | 79  | Uganda                 | 79  | Peru           | 79  |
| Taiwan                 | 80  | Ethiopia          | 80  | Cambodia               | 80  | Uzbekistan     | 80  |
| Brazil                 | 81  | Colombia          | 81  | Uruguay                | 81  | Vietnam        | 81  |
| Myanmar                | 82  | Canada            | 82  | Jordan                 | 82  | Armenia        | 82  |
| Tunisia                | 83  | Slovakia          | 83  | Georgia                | 83  | Germany        | 83  |
| Argentina              | 84  | Nepal             | 84  | Afghanistan            | 84  | Greece         | 84  |
| Oman                   | 85  | Slovenia          | 85  | Mozambique             | 85  | India          | 85  |
| Madagascar             | 86  | Honduras          | 86  | Yemen                  | 86  | Ireland        | 86  |
| Poland                 | 87  | Cameroon          | 87  | Libya                  | 87  | Italy          | 87  |
| Cambodia               | 88  | Congo             | 88  | Cameroon               | 88  | Kazakhstan     | 88  |
| Brunei                 | 89  | Gabon             | 89  | Lithuania              | 89  | Kyrgyzstan     | 89  |
| Yemen                  | 90  | Spain             | 90  | Costa Rica             | 90  | Lithuania      | 90  |
| Germany                | 91  | Morocco           | 91  | Burkina Faso           | 91  | Nepal          | 91  |
| Belgium                | 92  | Armenia           | 92  | Angola                 | 92  | Netherlands    | 92  |
| Uganda                 | 93  | Azerbaijan        | 93  | Bosnia and Herzegovina | 93  | Nicaragua      | 93  |
| Malaysia               | 94  | Georgia           | 94  | Madagascar             | 94  | Singapore      | 94  |
| Japan                  | 95  | Kazakhstan        | 95  | Armenia                | 95  | Sudan          | 95  |
| South Korea            | 96  | Kyrgyzstan        | 96  | Bolivia                | 96  | Albania        | 96  |
| Qatar                  | 97  | Ukraine           | 97  | Moldova                | 97  | Algeria        | 97  |
| Singapore              | 98  | Philippines       | 98  | Slovenia               | 98  | Australia      | 98  |
| Slovenia               | 99  | Thailand          | 99  | Haiti                  | 99  | Austria        | 99  |
| Romania                | 100 | Uruguay           | 100 | Guatemala              | 100 | Azerbaijan     | 100 |
| South Sudan            | 101 | Bolivia           | 101 | United Arab Emirates   | 101 | Bahrain        | 101 |
| Iran                   | 102 | Czech Republic    | 102 | Paraguay               | 102 | Bangladesh     | 102 |
| Morocco                | 103 | South Korea       | 103 | El Salvador            | 103 | Bulgaria       | 103 |
| Mauritania             | 104 | Israel            | 104 | Latvia                 | 104 | Cyprus         | 104 |
| Venezuela              | 105 | Algeria           | 105 | Mali                   | 105 | Czech Republic | 105 |
| Bosnia and Herzegovina | 106 | Haiti             | 106 | Jamaica                | 106 | Denmark        | 106 |
| Mozambique             | 107 | Venezuela         | 107 | Papua New Guinea       | 107 | Egypt          | 107 |
| Djibouti               | 108 | Denmark           | 108 | Zimbabwe               | 108 | Hungary        | 108 |
| Malawi                 | 109 | Austria           | 109 | Zambia                 | 109 | Iran           | 109 |
| Belarus                | 110 | Indonesia         | 110 | Cyprus                 | 110 | Japan          | 110 |

|                       |     |              |     |                     |     |             |     |
|-----------------------|-----|--------------|-----|---------------------|-----|-------------|-----|
| Uzbekistan            | 111 | Russia       | 111 | Panama              | 111 | Kuwait      | 111 |
| Colombia              | 112 | Togo         | 112 | Senegal             | 112 | Lebanon     | 112 |
| Nicaragua             | 113 | Chad         | 113 | Rwanda              | 113 | Mongolia    | 113 |
| Vietnam               | 114 | Burundi      | 114 | Honduras            | 114 | Montenegro  | 114 |
| Kyrgyzstan            | 115 | Djibouti     | 115 | Albania             | 115 | Morocco     | 115 |
| Burundi               | 116 | Eritrea      | 116 | Estonia             | 116 | New Zealand | 116 |
| Guinea                | 117 | Somalia      | 117 | Nicaragua           | 117 | Norway      | 117 |
| Eritrea               | 118 | Vietnam      | 118 | Palestine           | 118 | Pakistan    | 118 |
| Latvia                | 119 | Peru         | 119 | Somalia             | 119 | Philippines | 119 |
| Croatia               | 120 | Poland       | 120 | Laos                | 120 | Qatar       | 120 |
| Pakistan              | 121 | Bulgaria     | 121 | Kyrgyzstan          | 121 | Romania     | 121 |
| Ukraine               | 122 | Finland      | 122 | Malawi              | 122 | Serbia      | 122 |
| Somalia               | 123 | Tanzania     | 123 | Kuwait              | 123 | Slovakia    | 123 |
| Nepal                 | 124 | Japan        | 124 | Guinea              | 124 | Slovenia    | 124 |
| Montenegro            | 125 | Moldova      | 125 | Niger               | 125 | Somalia     | 125 |
| Zambia                | 126 | San Marino   | 126 | Mauritius           | 126 | Sri Lanka   | 126 |
| Mongolia              | 127 | Croatia      | 127 | Benin               | 127 | Tunisia     | 127 |
| Ethiopia              | 128 | Switzerland  | 128 | Congo               | 128 |             |     |
| Burkina Faso          | 129 | Ecuador      | 129 | Luxembourg          | 129 |             |     |
| Togo                  | 130 | South Africa | 130 | Trinidad and Tobago | 130 |             |     |
| Botswana              | 131 | Argentina    | 131 | Togo                | 131 |             |     |
| Italy                 | 132 | Monaco       | 132 | Chad                | 132 |             |     |
| Sao Tome and Principe | 133 | Yemen        | 133 | Eritrea             | 133 |             |     |
| Saudi Arabia          | 134 | Iceland      | 134 | Burundi             | 134 |             |     |
| Mexico                | 135 | Norway       | 135 | Sierra Leone        | 135 |             |     |
| Guatemala             | 136 | Netherlands  | 136 | South Sudan         | 136 |             |     |
| Armenia               | 137 | Belarus      | 137 | Malta               | 137 |             |     |
| Azerbaijan            | 138 | Australia    | 138 | Oman                | 138 |             |     |
| Bulgaria              | 139 | Ghana        | 139 | Qatar               | 139 |             |     |
| Namibia               | 140 | Latvia       | 140 | Montenegro          | 140 |             |     |
| Moldova               | 141 | Mongolia     | 141 | Namibia             | 141 |             |     |
| Kenya                 | 142 | Botswana     | 142 | Mauritania          | 142 |             |     |
| Lithuania             | 143 | Sweden       | 143 | Botswana            | 143 |             |     |
| Benin                 | 144 | Italy        | 144 | Mongolia            | 144 |             |     |
| Guinea-Bissau         | 145 | France       | 145 | Bahrain             | 145 |             |     |
| Cameroon              | 146 | Myanmar      | 146 | Liberia             | 146 |             |     |
| Georgia               | 147 | Greece       | 147 | Fiji                | 147 |             |     |
| Hungary               | 148 | Luxembourg   | 148 | Iceland             | 148 |             |     |

| Czech Republic             | 149   | Belgium               | 149   | Bahamas                      | 149   |                                        |       |
|----------------------------|-------|-----------------------|-------|------------------------------|-------|----------------------------------------|-------|
| Sierra Leone               | 150   | Channel Islands       | 150   | Barbados                     | 150   |                                        |       |
| Liberia                    | 151   | Rwanda                | 151   | Gabon                        | 151   |                                        |       |
| Gambia                     | 152   | United Kingdom        | 152   | Brunei                       | 152   |                                        |       |
| Bhutan                     | 153   | Estonia               | 153   | Guyana                       | 153   |                                        |       |
| Niger                      | 154   | Cambodia              | 154   | Suriname                     | 154   |                                        |       |
| Kazakhstan                 | 155   | Laos                  | 155   | Equatorial Guinea            | 155   |                                        |       |
| Serbia                     | 156   | Angola                | 156   | Guinea-Bissau                | 156   |                                        |       |
| Slovakia                   | 157   | Madagascar            | 157   | Djibouti                     | 157   |                                        |       |
| Mali                       | 158   | Malawi                | 158   | Gambia                       | 158   |                                        |       |
| Nigeria                    | 159   | Namibia               | 159   | Bhutan                       | 159   |                                        |       |
| Russia                     | 160   | Zambia                | 160   | Andorra                      | 160   |                                        |       |
| Zimbabwe                   | 161   | Lithuania             | 161   | Saint Lucia                  | 161   |                                        |       |
| Chad                       | 162   | Mozambique            | 162   | Maldives                     | 162   |                                        |       |
| Senegal                    | 163   | Ireland               | 163   | Bermuda                      | 163   |                                        |       |
| Albania                    | 164   | Kenya                 | 164   | Grenada                      | 164   |                                        |       |
| Bangladesh                 | 165   | Uganda                | 165   | Antigua and Barbuda          | 165   |                                        |       |
| Ghana                      | 166   | Burkina Faso          | 166   | Belize                       | 166   |                                        |       |
| China                      | 167   | Guinea                | 167   | Seychelles                   | 167   |                                        |       |
| Estonia                    | 168   | Guinea-Bissau         | 168   | Dominica                     | 168   |                                        |       |
| India                      | 169   | Liberia               | 169   | Sao Tome and Principe        | 169   |                                        |       |
| South Africa               | 170   | Mali                  | 170   | Greenland                    | 170   |                                        |       |
|                            |       | Mauritania            | 171   |                              |       |                                        |       |
|                            |       | Niger                 | 172   |                              |       |                                        |       |
|                            |       | Nigeria               | 173   |                              |       |                                        |       |
|                            |       | Sao Tome and Principe | 174   |                              |       |                                        |       |
|                            |       | Senegal               | 175   |                              |       |                                        |       |
|                            |       | Sierra Leone          | 176   |                              |       |                                        |       |
|                            |       | Greenland             | 177   |                              |       |                                        |       |
|                            |       | Gambia                | 178   |                              |       |                                        |       |
|                            |       | Zimbabwe              | 179   |                              |       |                                        |       |
|                            |       | Benin                 | 180   |                              |       |                                        |       |
| Prevalence of Liver Cancer |       | Prevalence TB         |       | Prevalence of Stomach Cancer |       | Prevalence of Smoker Aged 10 and Older |       |
| Country                    | Index | Country               | Index | Country                      | Index | Country                                | Index |
| China                      | 1     | India                 | 1     | China                        | 1     | Montenegro                             | 1     |
| Japan                      | 2     | China                 | 2     | Japan                        | 2     | Bosnia and Herzegovina                 | 2     |
| South Korea                | 3     | Indonesia             | 3     | India                        | 3     | Bulgaria                               | 3     |
| United States              | 4     | Nigeria               | 4     | United States                | 4     | Greece                                 | 4     |

|                |    |               |    |                |    |                  |    |
|----------------|----|---------------|----|----------------|----|------------------|----|
| Taiwan         | 5  | Brazil        | 5  | Russia         | 5  | Serbia           | 5  |
| Thailand       | 6  | Vietnam       | 6  | South Korea    | 6  | Croatia          | 6  |
| Italy          | 7  | Russia        | 7  | Germany        | 7  | Latvia           | 7  |
| Germany        | 8  | Pakistan      | 8  | Italy          | 8  | Ukraine          | 8  |
| Vietnam        | 9  | Mexico        | 9  | Brazil         | 9  | Laos             | 9  |
| Egypt          | 10 | Philippines   | 10 | United Kingdom | 10 | Russia           | 10 |
| Spain          | 11 | Bangladesh    | 11 | Spain          | 11 | Indonesia        | 11 |
| France         | 12 | Egypt         | 12 | Ukraine        | 12 | Papua New Guinea | 12 |
| United Kingdom | 13 | Thailand      | 13 | Indonesia      | 13 | Lebanon          | 13 |
| Indonesia      | 14 | South Africa  | 14 | Mexico         | 14 | Hungary          | 14 |
| Mongolia       | 15 | United States | 15 | France         | 15 | Belarus          | 15 |
| Philippines    | 16 | Sudan         | 16 | Colombia       | 16 | Chile            | 16 |
| Mali           | 17 | Ethiopia      | 17 | Canada         | 17 | Austria          | 17 |
| Mozambique     | 18 | Myanmar       | 18 | Taiwan         | 18 | Spain            | 18 |
| Guinea         | 19 | Turkey        | 19 | Iran           | 19 | Cyprus           | 19 |
| Singapore      | 20 | Ukraine       | 20 | Turkey         | 20 | Lithuania        | 20 |
| Austria        | 21 | Iran          | 21 | Vietnam        | 21 | France           | 21 |
| Canada         | 22 | Kenya         | 22 | Bangladesh     | 22 | Poland           | 22 |
| Australia      | 23 | Uganda        | 23 | Australia      | 23 | Czech Republic   | 23 |
| Switzerland    | 24 | Japan         | 24 | Poland         | 24 | Romania          | 24 |
| Niger          | 25 | Tanzania      | 25 | Netherlands    | 25 | Mongolia         | 25 |
| Ghana          | 26 | Colombia      | 26 | Pakistan       | 26 | Jordan           | 26 |
| Myanmar        | 27 | Morocco       | 27 | Argentina      | 27 | Georgia          | 27 |
| Finland        | 28 | Iraq          | 28 | Thailand       | 28 | Japan            | 28 |
| Romania        | 29 | Saudi Arabia  | 29 | Venezuela      | 29 | Armenia          | 29 |
| Cameroon       | 30 | Poland        | 30 | Portugal       | 30 | Slovenia         | 30 |
| Mexico         | 31 | Malaysia      | 31 | Chile          | 31 | Maldives         | 31 |
| Guatemala      | 32 | Germany       | 32 | Peru           | 32 | Andorra          | 32 |
| Senegal        | 33 | Afghanistan   | 33 | Myanmar        | 33 | Estonia          | 33 |
| Burkina Faso   | 34 | Taiwan        | 34 | Afghanistan    | 34 | Uruguay          | 34 |
| Gambia         | 35 | Venezuela     | 35 | Belarus        | 35 | Philippines      | 35 |
| Pakistan       | 36 | Yemen         | 36 | Romania        | 36 | Germany          | 36 |
| Zimbabwe       | 37 | Nepal         | 37 | Greece         | 37 | China            | 37 |
| Malaysia       | 38 | Italy         | 38 | Austria        | 38 | Tunisia          | 38 |
| Croatia        | 39 | Mozambique    | 39 | Nigeria        | 39 | Bangladesh       | 39 |
| Denmark        | 40 | Madagascar    | 40 | Philippines    | 40 | Turkey           | 40 |
| Chad           | 41 | Cameroon      | 41 | Costa Rica     | 41 | Luxembourg       | 41 |
| Sweden         | 42 | France        | 42 | Uzbekistan     | 42 | Italy            | 42 |

|                  |    |                      |    |                |    |                |    |
|------------------|----|----------------------|----|----------------|----|----------------|----|
| New Zealand      | 43 | United Kingdom       | 43 | Sudan          | 43 | United Kingdom | 43 |
| Netherlands      | 44 | South Korea          | 44 | Ecuador        | 44 | Ireland        | 44 |
| Benin            | 45 | Peru                 | 45 | Belgium        | 45 | Slovakia       | 45 |
| Belgium          | 46 | Angola               | 46 | Yemen          | 46 | Kazakhstan     | 46 |
| Moldova          | 47 | Ghana                | 47 | Kazakhstan     | 47 | Switzerland    | 47 |
| Greece           | 48 | Algeria              | 48 | Ethiopia       | 48 | Kyrgyzstan     | 48 |
| Portugal         | 49 | Syria                | 49 | Czech Republic | 49 | Palestine      | 49 |
| Chile            | 50 | Burkina Faso         | 50 | Slovakia       | 50 | South Korea    | 50 |
| Russia           | 51 | Romania              | 51 | Guatemala      | 51 | Belgium        | 51 |
| Czech Republic   | 52 | Uzbekistan           | 52 | Bolivia        | 52 | Syria          | 52 |
| Slovakia         | 53 | Zambia               | 53 | Kenya          | 53 | Cambodia       | 53 |
| Saudi Arabia     | 54 | Cambodia             | 54 | Egypt          | 54 | Moldova        | 54 |
| Hungary          | 55 | Niger                | 55 | South Africa   | 55 | Azerbaijan     | 55 |
| Sierra Leone     | 56 | Tunisia              | 56 | Switzerland    | 56 | Nepal          | 56 |
| Togo             | 57 | Sri Lanka            | 57 | Azerbaijan     | 57 | Malaysia       | 57 |
| Azerbaijan       | 58 | Mali                 | 58 | Malaysia       | 58 | Portugal       | 58 |
| India            | 59 | Kazakhstan           | 59 | Nepal          | 59 | Argentina      | 59 |
| Papua New Guinea | 60 | Senegal              | 60 | Hungary        | 60 | Egypt          | 60 |
| Liberia          | 61 | Chad                 | 61 | Sweden         | 61 | Malta          | 61 |
| Bulgaria         | 62 | Guatemala            | 62 | Algeria        | 62 | Denmark        | 62 |
| Laos             | 63 | Argentina            | 63 | Serbia         | 63 | Thailand       | 63 |
| Armenia          | 64 | Malawi               | 64 | Tanzania       | 64 | Vietnam        | 64 |
| Uganda           | 65 | South Sudan          | 65 | Croatia        | 65 | Albania        | 65 |
| Kazakhstan       | 66 | Belarus              | 66 | Singapore      | 66 | Myanmar        | 66 |
| Norway           | 67 | Rwanda               | 67 | Bulgaria       | 67 | Israel         | 67 |
| Guinea-Bissau    | 68 | Ecuador              | 68 | Finland        | 68 | Mauritius      | 68 |
| Angola           | 69 | Burundi              | 69 | Cuba           | 69 | Finland        | 69 |
| Slovenia         | 70 | Guinea               | 70 | Mali           | 70 | New Zealand    | 70 |
| Cambodia         | 71 | Zimbabwe             | 71 | Cameroon       | 71 | Netherlands    | 71 |
| Mauritania       | 72 | Cuba                 | 72 | Lithuania      | 72 | Kuwait         | 72 |
| Albania          | 73 | Spain                | 73 | Morocco        | 73 | Djibouti       | 73 |
| Somalia          | 74 | Benin                | 74 | Ireland        | 74 | Yemen          | 74 |
| Ireland          | 75 | Czech Republic       | 75 | Sri Lanka      | 75 | Suriname       | 75 |
| Georgia          | 76 | Hungary              | 76 | Ghana          | 76 | Cuba           | 76 |
| South Africa     | 77 | Canada               | 77 | Cambodia       | 77 | Iraq           | 77 |
| Kyrgyzstan       | 78 | United Arab Emirates | 78 | Burkina Faso   | 78 | Libya          | 78 |
| Luxembourg       | 79 | Haiti                | 79 | Denmark        | 79 | Norway         | 79 |
| Kenya            | 80 | Dominican Republic   | 80 | El Salvador    | 80 | Seychelles     | 80 |

|                        |     |                        |     |                        |     |                      |     |
|------------------------|-----|------------------------|-----|------------------------|-----|----------------------|-----|
| Zambia                 | 81  | Papua New Guinea       | 81  | Panama                 | 81  | Sierra Leone         | 81  |
| Brunei                 | 82  | Serbia                 | 82  | Norway                 | 82  | Trinidad and Tobago  | 82  |
| Gabon                  | 83  | Australia              | 83  | Haiti                  | 83  | Iceland              | 83  |
| Bosnia and Herzegovina | 84  | Bolivia                | 84  | New Zealand            | 84  | Australia            | 84  |
| Fiji                   | 85  | Libya                  | 85  | Saudi Arabia           | 85  | Canada               | 85  |
| Iceland                | 86  | Azerbaijan             | 86  | Latvia                 | 86  | Fiji                 | 86  |
| Nicaragua              | 87  | Sierra Leone           | 87  | Israel                 | 87  | South Africa         | 87  |
| Lithuania              | 88  | Bulgaria               | 88  | Georgia                | 88  | Pakistan             | 88  |
| Brazil                 | 89  | Honduras               | 89  | Senegal                | 89  | Qatar                | 89  |
| Cyprus                 | 90  | Togo                   | 90  | Niger                  | 90  | Brunei               | 90  |
| Equatorial Guinea      | 91  | Netherlands            | 91  | Papua New Guinea       | 91  | Taiwan               | 91  |
| Qatar                  | 92  | Oman                   | 92  | Mongolia               | 92  | United States        | 92  |
| Congo                  | 93  | Chile                  | 93  | Guinea                 | 93  | Botswana             | 93  |
| Eritrea                | 94  | Somalia                | 94  | Estonia                | 94  | Zambia               | 94  |
| Ukraine                | 95  | Laos                   | 95  | Madagascar             | 95  | India                | 95  |
| Ethiopia               | 96  | Paraguay               | 96  | Angola                 | 96  | Zimbabwe             | 96  |
| Montenegro             | 97  | El Salvador            | 97  | Uruguay                | 97  | Saudi Arabia         | 97  |
| Suriname               | 98  | Nicaragua              | 98  | Iraq                   | 98  | Namibia              | 98  |
| Greenland              | 99  | Kuwait                 | 99  | Zimbabwe               | 99  | United Arab Emirates | 99  |
| Andorra                | 100 | Palestine              | 100 | Uganda                 | 100 | Mexico               | 100 |
| Botswana               | 101 | Portugal               | 101 | Slovenia               | 101 | Guyana               | 101 |
| Colombia               | 102 | Belgium                | 102 | Mozambique             | 102 | Malawi               | 102 |
| Iran                   | 103 | Sweden                 | 103 | Dominican Republic     | 103 | Iran                 | 103 |
| Turkey                 | 104 | Costa Rica             | 104 | Chad                   | 104 | Madagascar           | 104 |
| Bangladesh             | 105 | Greece                 | 105 | Kyrgyzstan             | 105 | Venezuela            | 105 |
| Poland                 | 106 | Slovakia               | 106 | Lebanon                | 106 | Mozambique           | 106 |
| Argentina              | 107 | Liberia                | 107 | Tunisia                | 107 | Algeria              | 107 |
| Venezuela              | 108 | Eritrea                | 108 | Moldova                | 108 | Morocco              | 108 |
| Peru                   | 109 | Congo                  | 109 | Somalia                | 109 | Sudan                | 109 |
| Afghanistan            | 110 | Kyrgyzstan             | 110 | Bosnia and Herzegovina | 110 | Afghanistan          | 110 |
| Belarus                | 111 | Austria                | 111 | Armenia                | 111 | Paraguay             | 111 |
| Nigeria                | 112 | Moldova                | 112 | Syria                  | 112 | Sweden               | 112 |
| Costa Rica             | 113 | Lebanon                | 113 | Benin                  | 113 | Colombia             | 113 |
| Uzbekistan             | 114 | Croatia                | 114 | Nicaragua              | 114 | Nicaragua            | 114 |
| Sudan                  | 115 | Panama                 | 115 | Zambia                 | 115 | Jamaica              | 115 |
| Ecuador                | 116 | Mauritania             | 116 | Albania                | 116 | Gambia               | 116 |
| Yemen                  | 117 | Georgia                | 117 | Paraguay               | 117 | Sri Lanka            | 117 |
| Bolivia                | 118 | Bosnia and Herzegovina | 118 | Honduras               | 118 | Gabon                | 118 |

|                      |     |                     |     |                      |     |                    |     |
|----------------------|-----|---------------------|-----|----------------------|-----|--------------------|-----|
| Nepal                | 119 | Qatar               | 119 | Sierra Leone         | 119 | Mauritania         | 119 |
| Algeria              | 120 | Switzerland         | 120 | Togo                 | 120 | Saint Lucia        | 120 |
| Serbia               | 121 | Lithuania           | 121 | Laos                 | 121 | Bahrain            | 121 |
| Tanzania             | 122 | Namibia             | 122 | Rwanda               | 122 | Honduras           | 122 |
| Cuba                 | 123 | Denmark             | 123 | Libya                | 123 | Tanzania           | 123 |
| Morocco              | 124 | Botswana            | 124 | Burundi              | 124 | Uganda             | 124 |
| Sri Lanka            | 125 | Jamaica             | 125 | South Sudan          | 125 | Burkina Faso       | 125 |
| El Salvador          | 126 | Gambia              | 126 | United Arab Emirates | 126 | Angola             | 126 |
| Panama               | 127 | Armenia             | 127 | Jamaica              | 127 | Bolivia            | 127 |
| Haiti                | 128 | Israel              | 128 | Jordan               | 128 | Dominican Republic | 128 |
| Latvia               | 129 | Finland             | 129 | Malawi               | 129 | Uzbekistan         | 129 |
| Israel               | 130 | Mongolia            | 130 | Eritrea              | 130 | Guinea             | 130 |
| Estonia              | 131 | Mauritius           | 131 | Cyprus               | 131 | Somalia            | 131 |
| Madagascar           | 132 | Latvia              | 132 | Liberia              | 132 | Kenya              | 132 |
| Uruguay              | 133 | Bahrain             | 133 | Congo                | 133 | Congo              | 133 |
| Iraq                 | 134 | Guinea-Bissau       | 134 | Mauritania           | 134 | Oman               | 134 |
| Dominican Republic   | 135 | Albania             | 135 | Oman                 | 135 | Grenada            | 135 |
| Lebanon              | 136 | Jordan              | 136 | Luxembourg           | 136 | Brazil             | 136 |
| Tunisia              | 137 | Gabon               | 137 | Palestine            | 137 | South Sudan        | 137 |
| Syria                | 138 | Norway              | 138 | Mauritius            | 138 | Singapore          | 138 |
| Paraguay             | 139 | Ireland             | 139 | Guinea-Bissau        | 139 | Costa Rica         | 139 |
| Honduras             | 140 | Slovenia            | 140 | Malta                | 140 | Mali               | 140 |
| Rwanda               | 141 | Trinidad and Tobago | 141 | Iceland              | 141 | Guinea-Bissau      | 141 |
| Libya                | 142 | New Zealand         | 142 | Trinidad and Tobago  | 142 | El Salvador        | 142 |
| Burundi              | 143 | Estonia             | 143 | Kuwait               | 143 | Peru               | 143 |
| South Sudan          | 144 | Singapore           | 144 | Qatar                | 144 | Chad               | 144 |
| United Arab Emirates | 145 | Uruguay             | 145 | Montenegro           | 145 | Belize             | 145 |
| Jamaica              | 146 | Djibouti            | 146 | Gabon                | 146 | Burundi            | 146 |
| Jordan               | 147 | Fiji                | 147 | Brunei               | 147 | Liberia            | 147 |
| Malawi               | 148 | Equatorial Guinea   | 148 | Botswana             | 148 | Cameroon           | 148 |
| Oman                 | 149 | Guyana              | 149 | Gambia               | 149 | Rwanda             | 149 |
| Palestine            | 150 | Montenegro          | 150 | Barbados             | 150 | Senegal            | 150 |
| Mauritius            | 151 | Suriname            | 151 | Namibia              | 151 | Guatemala          | 151 |
| Malta                | 152 | Bhutan              | 152 | Guyana               | 152 | Togo               | 152 |
| Trinidad and Tobago  | 153 | Maldives            | 153 | Fiji                 | 153 | Bahamas            | 153 |
| Kuwait               | 154 | Cyprus              | 154 | Bhutan               | 154 | Haiti              | 154 |
| Barbados             | 155 | Bahamas             | 155 | Bahrain              | 155 | Niger              | 155 |
| Namibia              | 156 | Belize              | 156 | Djibouti             | 156 | Benin              | 156 |

|                       |     |                       |     |                       |     |                       |     |
|-----------------------|-----|-----------------------|-----|-----------------------|-----|-----------------------|-----|
| Guyana                | 157 | Barbados              | 157 | Suriname              | 157 | Eritrea               | 157 |
| Bhutan                | 158 | Luxembourg            | 158 | Bahamas               | 158 | Ecuador               | 158 |
| Bahrain               | 159 | Sao Tome and Principe | 159 | Belize                | 159 | Barbados              | 159 |
| Djibouti              | 160 | Saint Lucia           | 160 | Saint Lucia           | 160 | Dominica              | 160 |
| Bahamas               | 161 | Brunei                | 161 | Equatorial Guinea     | 161 | Bhutan                | 161 |
| Belize                | 162 | Malta                 | 162 | Andorra               | 162 | Ethiopia              | 162 |
| Saint Lucia           | 163 | Seychelles            | 163 | Bermuda               | 163 | Nigeria               | 163 |
| Bermuda               | 164 | Iceland               | 164 | Sao Tome and Principe | 164 | Sao Tome and Principe | 164 |
| Sao Tome and Principe | 165 | Grenada               | 165 | Dominica              | 165 | Panama                | 165 |
| Dominica              | 166 | Antigua and Barbuda   | 166 | Grenada               | 166 | Ghana                 | 166 |
| Grenada               | 167 | Dominica              | 167 | Antigua and Barbuda   | 167 | Equatorial Guinea     | 167 |
| Antigua and Barbuda   | 168 | Bermuda               | 168 | Maldives              | 168 | Antigua and Barbuda   | 168 |
| Maldives              | 169 | Andorra               | 169 | Greenland             | 169 |                       |     |
| Seychelles            | 170 | Greenland             | 170 | Seychelles            | 170 |                       |     |



**Table S4.** Country list corresponding to the index in the horizontal axis of Figure S1.

| Alzheimers Dementia |       | Stomach Cancer |       | Liver Cancer   |       | Lung Cancer    |       |
|---------------------|-------|----------------|-------|----------------|-------|----------------|-------|
| Country             | Index | Country        | Index | Country        | Index | Country        | Index |
| Finland             | 1     | Mongolia       | 1     | Mongolia       | 1     | Hungary        | 1     |
| Kuwait              | 2     | China          | 2     | Laos           | 2     | Serbia         | 2     |
| Turkey              | 3     | Kyrgyzstan     | 3     | Viet Nam       | 3     | Montenegro     | 3     |
| Saudi Arabia        | 4     | Albania        | 4     | Egypt          | 4     | China          | 4     |
| United Kingdom      | 5     | Guatemala      | 5     | Gambia         | 5     | Denmark        | 5     |
| Tunisia             | 6     | Bhutan         | 6     | China          | 6     | Poland         | 6     |
| Libya               | 7     | Ecuador        | 7     | Thailand       | 7     | Croatia        | 7     |
| United States       | 8     | Sao Tome       | 8     | Cambodia       | 8     | Netherlands    | 8     |
| Syria               | 9     | Kazakhstan     | 9     | Guinea         | 9     | Turkey         | 9     |
| Lebanon             | 10    | Russia         | 10    | Liberia        | 10    | Belgium        | 10    |
| Bahrain             | 11    | Costa Rica     | 11    | Sierra Leone   | 11    | Canada         | 11    |
| Netherlands         | 12    | Iran           | 12    | Burkina Faso   | 12    | Slovenia       | 12    |
| Myanmar             | 13    | Honduras       | 13    | South Korea    | 13    | Romania        | 13    |
| Jordan              | 14    | Belarus        | 14    | Guatemala      | 14    | Cuba           | 14    |
| Iceland             | 15    | Chile          | 15    | Rwanda         | 15    | United States  | 15    |
| Morocco             | 16    | El Salvador    | 16    | Ghana          | 16    | United Kingdom | 16    |
| Sweden              | 17    | Japan          | 17    | Nigeria        | 17    | France         | 17    |
| Switzerland         | 18    | Colombia       | 18    | Togo           | 18    | Albania        | 18    |
| Iran                | 19    | Viet Nam       | 19    | Mauritania     | 19    | Uruguay        | 19    |
| Yemen               | 20    | Afghanistan    | 20    | Guinea-Bissau  | 20    | Greece         | 20    |
| Norway              | 21    | Peru           | 21    | Philippines    | 21    | Bulgaria       | 21    |
| Canada              | 22    | South Korea    | 22    | Honduras       | 22    | Bosnia/Herzeg. | 22    |
| Algeria             | 23    | Lithuania      | 23    | Myanmar        | 23    | Russia         | 23    |
| Greece              | 24    | Turkey         | 24    | Senegal        | 24    | Slovakia       | 24    |
| Sudan               | 25    | Latvia         | 25    | Nicaragua      | 25    | Germany        | 25    |
| France              | 26    | Azerbaijan     | 26    | Benin          | 26    | Estonia        | 26    |
| Belgium             | 27    | Ukraine        | 27    | Belize         | 27    | Ireland        | 27    |
| Australia           | 28    | Estonia        | 28    | Dominican Rep. | 28    | Czech Republic | 28    |
| Spain               | 29    | Portugal       | 29    | Singapore      | 29    | Latvia         | 29    |
| Denmark             | 30    | Saint Lucia    | 30    | Indonesia      | 30    | Luxembourg     | 30    |
| Ireland             | 31    | Myanmar        | 31    | Moldova        | 31    | Norway         | 31    |
| Egypt               | 32    | Nicaragua      | 32    | Congo          | 32    | Brunei         | 32    |
| Qatar               | 33    | Panama         | 33    | Japan          | 33    | Spain          | 33    |
| Nicaragua           | 34    | Kenya          | 34    | Romania        | 34    | Viet Nam       | 34    |
| Bosnia/Herzeg.      | 35    | Romania        | 35    | Qatar          | 35    | Lithuania      | 35    |

|                |    |                |    |                |    |              |    |
|----------------|----|----------------|----|----------------|----|--------------|----|
| Peru           | 36 | Togo           | 36 | Kyrgyzstan     | 36 | Italy        | 36 |
| Oman           | 37 | Rwanda         | 37 | Uganda         | 37 | Timor-Leste  | 37 |
| El Salvador    | 38 | Uruguay        | 38 | Fiji           | 38 | Iceland      | 38 |
| Iraq           | 39 | Croatia        | 39 | Brunei         | 39 | Austria      | 39 |
| New Zealand    | 40 | Venezuela      | 40 | El Salvador    | 40 | South Korea  | 40 |
| Montenegro     | 41 | Moldova        | 41 | Malaysia       | 41 | Cyprus       | 41 |
| Afghanistan    | 42 | Mali           | 42 | Grenada        | 42 | Singapore    | 42 |
| Paraguay       | 43 | Bulgaria       | 43 | Suriname       | 43 | Kazakhstan   | 43 |
| Malaysia       | 44 | Uzbekistan     | 44 | Bosnia/Herzeg. | 44 | Armenia      | 44 |
| Poland         | 45 | Armenia        | 45 | Montenegro     | 45 | Thailand     | 45 |
| Gabon          | 46 | Hungary        | 46 | France         | 46 | Mongolia     | 46 |
| Maldives       | 47 | Georgia        | 47 | Chad           | 47 | New Zealand  | 47 |
| Haiti          | 48 | Slovenia       | 48 | Italy          | 48 | Belarus      | 48 |
| Georgia        | 49 | Brazil         | 49 | Armenia        | 49 | Japan        | 49 |
| Suriname       | 50 | Slovakia       | 50 | Haiti          | 50 | Argentina    | 50 |
| Belarus        | 51 | Montenegro     | 51 | Ecuador        | 51 | Ukraine      | 51 |
| Armenia        | 52 | Haiti          | 52 | Georgia        | 52 | Switzerland  | 52 |
| Thailand       | 53 | Jamaica        | 53 | Peru           | 53 | Australia    | 53 |
| Equ. Guinea    | 54 | Italy          | 54 | South Sudan    | 54 | South Africa | 54 |
| Cuba           | 55 | Serbia         | 55 | Bulgaria       | 55 | Malta        | 55 |
| Kazakhstan     | 56 | Belize         | 56 | Kazakhstan     | 56 | Portugal     | 56 |
| Uruguay        | 57 | Bosnia/Herzeg. | 57 | Albania        | 57 | Israel       | 57 |
| Bulgaria       | 58 | Poland         | 58 | Zimbabwe       | 58 | Myanmar      | 58 |
| Luxembourg     | 59 | Dominican Rep. | 59 | Costa Rica     | 59 | Malaysia     | 59 |
| Slovakia       | 60 | Brunei         | 60 | Timor-Leste    | 60 | Finland      | 60 |
| Laos           | 61 | Zimbabwe       | 61 | Afghanistan    | 61 | Moldova      | 61 |
| Nepal          | 62 | Grenada        | 62 | Slovenia       | 62 | Indonesia    | 62 |
| Dominican Rep. | 63 | Syria          | 63 | Luxembourg     | 63 | Sweden       | 63 |
| Viet Nam       | 64 | Somalia        | 64 | Mexico         | 64 | Sao Tome     | 64 |
| Barbados       | 65 | Bolivia        | 65 | Greece         | 65 | Libya        | 65 |
| Indonesia      | 66 | Spain          | 66 | Libya          | 66 | Syria        | 66 |
| Albania        | 67 | Paraguay       | 67 | Croatia        | 67 | Philippines  | 67 |
| China          | 68 | Argentina      | 68 | Niger          | 68 | Georgia      | 68 |
| Italy          | 69 | Singapore      | 69 | Kenya          | 69 | Lebanon      | 69 |
| Timor-Leste    | 70 | Mauritius      | 70 | South Africa   | 70 | Venezuela    | 70 |
| Azerbaijan     | 71 | Mexico         | 71 | Spain          | 71 | Grenada      | 71 |
| Seychelles     | 72 | Nepal          | 72 | Equ. Guinea    | 72 | Tunisia      | 72 |
| Angola         | 73 | Germany        | 73 | Saudi Arabia   | 73 | Jordan       | 73 |

|              |     |                |     |                |     |                |     |
|--------------|-----|----------------|-----|----------------|-----|----------------|-----|
| Bolivia      | 74  | Senegal        | 74  | Austria        | 74  | Bahrain        | 74  |
| Malawi       | 75  | India          | 75  | Burundi        | 75  | Paraguay       | 75  |
| Israel       | 76  | Austria        | 76  | Bhutan         | 76  | Seychelles     | 76  |
| Sri Lanka    | 77  | Bahamas        | 77  | Azerbaijan     | 77  | Jamaica        | 77  |
| Rwanda       | 78  | Czech Republic | 78  | Portugal       | 78  | Belize         | 78  |
| Mauritania   | 79  | Cyprus         | 79  | Syria          | 79  | Iraq           | 79  |
| Gambia       | 80  | Barbados       | 80  | Colombia       | 80  | Suriname       | 80  |
| Mongolia     | 81  | Israel         | 81  | Serbia         | 81  | Laos           | 81  |
| Cambodia     | 82  | Greece         | 82  | Chile          | 82  | Brazil         | 82  |
| Argentina    | 83  | South Sudan    | 83  | Cameroon       | 83  | Dominican Rep. | 83  |
| Portugal     | 84  | Cambodia       | 84  | Angola         | 84  | Chile          | 84  |
| Kenya        | 85  | Qatar          | 85  | Brazil         | 85  | Cambodia       | 85  |
| Germany      | 86  | Bangladesh     | 86  | Kuwait         | 86  | Nepal          | 86  |
| Bhutan       | 87  | Madagascar     | 87  | Slovakia       | 87  | Morocco        | 87  |
| Burundi      | 88  | Iraq           | 88  | Russia         | 88  | Colombia       | 88  |
| Mali         | 89  | Uganda         | 89  | Sudan          | 89  | Kyrgyzstan     | 89  |
| Honduras     | 90  | Jordan         | 90  | United States  | 90  | Azerbaijan     | 90  |
| Ghana        | 91  | Algeria        | 91  | Cyprus         | 91  | Trinidad/Tob.  | 91  |
| Benin        | 92  | Seychelles     | 92  | Seychelles     | 92  | Qatar          | 92  |
| Togo         | 93  | Cuba           | 93  | Mali           | 93  | Bangladesh     | 93  |
| Burkina Faso | 94  | Antigua/Bar.   | 94  | Hungary        | 94  | Mauritius      | 94  |
| Chile        | 95  | Sri Lanka      | 95  | Gabon          | 95  | Peru           | 95  |
| Tanzania     | 96  | Suriname       | 96  | Iceland        | 96  | Saint Lucia    | 96  |
| Senegal      | 97  | Malta          | 97  | Switzerland    | 97  | Panama         | 97  |
| Uganda       | 98  | Ireland        | 98  | Panama         | 98  | Algeria        | 98  |
| Pakistan     | 99  | South Africa   | 99  | Uzbekistan     | 99  | Iran           | 99  |
| Mozambique   | 100 | Luxembourg     | 100 | Venezuela      | 100 | Bahamas        | 100 |
| Ethiopia     | 101 | Oman           | 101 | Mozambique     | 101 | India          | 101 |
| Djibouti     | 102 | Burundi        | 102 | Bahamas        | 102 | Maldives       | 102 |
| Hungary      | 103 | Zambia         | 103 | Jordan         | 103 | Barbados       | 103 |
| Zimbabwe     | 104 | France         | 104 | Iraq           | 104 | Afghanistan    | 104 |
| Namibia      | 105 | Netherlands    | 105 | Germany        | 105 | Madagascar     | 105 |
| Sierra Leone | 106 | New Zealand    | 106 | Australia      | 106 | Kuwait         | 106 |
| Cameroon     | 107 | Trinidad/Tob.  | 107 | Belgium        | 107 | Egypt          | 107 |
| Nigeria      | 108 | Bahrain        | 108 | Cuba           | 108 | Haiti          | 108 |
| Niger        | 109 | United Kingdom | 109 | Finland        | 109 | Nicaragua      | 109 |
| India        | 110 | Denmark        | 110 | Denmark        | 110 | Ecuador        | 110 |
| Congo        | 111 | Finland        | 111 | United Kingdom | 111 | Uzbekistan     | 111 |

|                |     |               |     |                |     |               |     |
|----------------|-----|---------------|-----|----------------|-----|---------------|-----|
| Cyprus         | 112 | Lebanon       | 112 | Argentina      | 112 | Costa Rica    | 112 |
| Guinea-Bissau  | 113 | Yemen         | 113 | Czech Republic | 113 | Mexico        | 113 |
| Liberia        | 114 | Belgium       | 114 | Guyana         | 114 | Honduras      | 114 |
| South Korea    | 115 | Malaysia      | 115 | Ireland        | 115 | Bhutan        | 115 |
| Chad           | 116 | Angola        | 116 | Somalia        | 116 | Gabon         | 116 |
| Botswana       | 117 | Norway        | 117 | Madagascar     | 117 | El Salvador   | 117 |
| South Africa   | 118 | Libya         | 118 | Eritrea        | 118 | Sri Lanka     | 118 |
| Malta          | 119 | Morocco       | 119 | Pakistan       | 119 | Fiji          | 119 |
| Czech Republic | 120 | Tunisia       | 120 | Lithuania      | 120 | Pakistan      | 120 |
| Sao Tome       | 121 | Liberia       | 121 | Canada         | 121 | Saudi Arabia  | 121 |
| Eritrea        | 122 | Maldives      | 122 | Antigua/Bar.   | 122 | Antigua/Bar.  | 122 |
| South Sudan    | 123 | Switzerland   | 123 | Djibouti       | 123 | Oman          | 123 |
| Fiji           | 124 | Iceland       | 124 | Oman           | 124 | Bolivia       | 124 |
| Croatia        | 125 | Mauritania    | 125 | Latvia         | 125 | Guyana        | 125 |
| Zambia         | 126 | Sierra Leone  | 126 | Sweden         | 126 | Equ. Guinea   | 126 |
| Grenada        | 127 | Guinea-Bissau | 127 | Israel         | 127 | Guatemala     | 127 |
| Guinea         | 128 | Canada        | 128 | Barbados       | 128 | Botswana      | 128 |
| Somalia        | 129 | Australia     | 129 | Paraguay       | 129 | Zimbabwe      | 129 |
| Austria        | 130 | Burkina Faso  | 130 | Estonia        | 130 | Yemen         | 130 |
| Brazil         | 131 | Tanzania      | 131 | Bolivia        | 131 | Namibia       | 131 |
| Brunei         | 132 | Sweden        | 132 | Trinidad/Tob.  | 132 | Ethiopia      | 132 |
| Madagascar     | 133 | Ghana         | 133 | Zambia         | 133 | Djibouti      | 133 |
| Bangladesh     | 134 | Guyana        | 134 | New Zealand    | 134 | Somalia       | 134 |
| Costa Rica     | 135 | Saudi Arabia  | 135 | Turkey         | 135 | Mozambique    | 135 |
| Serbia         | 136 | Ethiopia      | 136 | Poland         | 136 | Eritrea       | 136 |
| Bahamas        | 137 | Indonesia     | 137 | Mauritius      | 137 | Kenya         | 137 |
| Belize         | 138 | Pakistan      | 138 | Sri Lanka      | 138 | Uganda        | 138 |
| Trinidad/Tob.  | 139 | Philippines   | 139 | Botswana       | 139 | Ghana         | 139 |
| Japan          | 140 | Guinea        | 140 | Ukraine        | 140 | Burkina Faso  | 140 |
| Russia         | 141 | Eritrea       | 141 | Netherlands    | 141 | Mali          | 141 |
| Jamaica        | 142 | Djibouti      | 142 | Yemen          | 142 | South Sudan   | 142 |
| Panama         | 143 | Thailand      | 143 | Maldives       | 143 | Gambia        | 143 |
| Latvia         | 144 | Congo         | 144 | Saint Lucia    | 144 | Angola        | 144 |
| Antigua/Bar.   | 145 | Benin         | 145 | Malta          | 145 | Sudan         | 145 |
| Romania        | 146 | Fiji          | 146 | Iran           | 146 | Rwanda        | 146 |
| Lithuania      | 147 | Malawi        | 147 | Jamaica        | 147 | Guinea-Bissau | 147 |
| Estonia        | 148 | United States | 148 | India          | 148 | Senegal       | 148 |
| Ecuador        | 149 | Cameroon      | 149 | Belarus        | 149 | Zambia        | 149 |

|                 |              |                       |              |                                   |              |                                |              |
|-----------------|--------------|-----------------------|--------------|-----------------------------------|--------------|--------------------------------|--------------|
| Slovenia        | 150          | Egypt                 | 150          | Norway                            | 150          | Burundi                        | 150          |
| Mexico          | 151          | Laos                  | 151          | Bahrain                           | 151          | Togo                           | 151          |
| Guatemala       | 152          | Nigeria               | 152          | Bangladesh                        | 152          | Sierra Leone                   | 152          |
| Moldova         | 153          | Equ. Guinea           | 153          | Uruguay                           | 153          | Cameroon                       | 153          |
| Guyana          | 154          | Gabon                 | 154          | Lebanon                           | 154          | Liberia                        | 154          |
| Venezuela       | 155          | Chad                  | 155          | Tanzania                          | 155          | Mauritania                     | 155          |
| Saint Lucia     | 156          | Timor-Leste           | 156          | Namibia                           | 156          | Congo                          | 156          |
| Ukraine         | 157          | Sudan                 | 157          | Ethiopia                          | 157          | Chad                           | 157          |
| Colombia        | 158          | Niger                 | 158          | Malawi                            | 158          | Guinea                         | 158          |
| Mauritius       | 159          | Namibia               | 159          | Sao Tome                          | 159          | Nigeria                        | 159          |
| Uzbekistan      | 160          | Gambia                | 160          | Algeria                           | 160          | Benin                          | 160          |
| Philippines     | 161          | Kuwait                | 161          | Morocco                           | 161          | Malawi                         | 161          |
| Kyrgyzstan      | 162          | Mozambique            | 162          | Tunisia                           | 162          | Tanzania                       | 162          |
| Singapore       | 163          | Botswana              | 163          | Nepal                             | 163          | Niger                          | 163          |
| <b>Leukemia</b> |              | <b>Kidney Disease</b> |              | <b>Inflammatory Heart Disease</b> |              | <b>Rheumatic Heart Disease</b> |              |
| <b>Country</b>  | <b>Index</b> | <b>Country</b>        | <b>Index</b> | <b>Country</b>                    | <b>Index</b> | <b>Country</b>                 | <b>Index</b> |
| Kazakhstan      | 1            | Nicaragua             | 1            | Serbia                            | 1            | Pakistan                       | 1            |
| Iraq            | 2            | El Salvador           | 2            | Bosnia/Herzeg.                    | 2            | Bhutan                         | 2            |
| Syria           | 3            | Fiji                  | 3            | Russia                            | 3            | India                          | 3            |
| Seychelles      | 4            | Bolivia               | 4            | Latvia                            | 4            | Burkina Faso                   | 4            |
| Saint Lucia     | 5            | Seychelles            | 5            | Egypt                             | 5            | Angola                         | 5            |
| Ecuador         | 6            | Saudi Arabia          | 6            | Montenegro                        | 6            | Fiji                           | 6            |
| Eritrea         | 7            | Sao Tome              | 7            | Poland                            | 7            | Nepal                          | 7            |
| Greece          | 8            | Libya                 | 8            | Bulgaria                          | 8            | Haiti                          | 8            |
| Israel          | 9            | Jordan                | 9            | Belarus                           | 9            | Georgia                        | 9            |
| Ethiopia        | 10           | Kazakhstan            | 10           | Ukraine                           | 10           | Sierra Leone                   | 10           |
| Yemen           | 11           | Guatemala             | 11           | South Africa                      | 11           | Chad                           | 11           |
| Latvia          | 12           | Yemen                 | 12           | Saint Lucia                       | 12           | Argentina                      | 12           |
| Colombia        | 13           | Suriname              | 13           | Fiji                              | 13           | Sao Tome                       | 13           |
| Egypt           | 14           | Thailand              | 14           | Albania                           | 14           | Mali                           | 14           |
| Djibouti        | 15           | Egypt                 | 15           | Syria                             | 15           | Myanmar                        | 15           |
| France          | 16           | Afghanistan           | 16           | Ghana                             | 16           | Mongolia                       | 16           |
| Grenada         | 17           | Philippines           | 17           | Algeria                           | 17           | Equ. Guinea                    | 17           |
| Costa Rica      | 18           | Laos                  | 18           | Botswana                          | 18           | Eritrea                        | 18           |
| Cyprus          | 19           | Zimbabwe              | 19           | Haiti                             | 19           | Madagascar                     | 19           |
| Hungary         | 20           | Paraguay              | 20           | Romania                           | 20           | China                          | 20           |
| Paraguay        | 21           | Sierra Leone          | 21           | Guyana                            | 21           | Laos                           | 21           |
| United States   | 22           | Bhutan                | 22           | Saudi Arabia                      | 22           | Benin                          | 22           |

|                |    |                |    |              |    |               |    |
|----------------|----|----------------|----|--------------|----|---------------|----|
| Iran           | 23 | Haiti          | 23 | Lithuania    | 23 | Zimbabwe      | 23 |
| Jordan         | 24 | Kuwait         | 24 | Equ. Guinea  | 24 | Yemen         | 24 |
| Croatia        | 25 | Bahrain        | 25 | Namibia      | 25 | Togo          | 25 |
| Italy          | 26 | Tunisia        | 26 | Angola       | 26 | Gambia        | 26 |
| Panama         | 27 | Sudan          | 27 | Estonia      | 27 | Cameroon      | 27 |
| Estonia        | 28 | Peru           | 28 | Argentina    | 28 | Cambodia      | 28 |
| Belgium        | 29 | Iraq           | 29 | Yemen        | 29 | Burundi       | 29 |
| Austria        | 30 | Myanmar        | 30 | Zimbabwe     | 30 | Somalia       | 30 |
| Slovakia       | 31 | South Africa   | 31 | Barbados     | 31 | Nigeria       | 31 |
| El Salvador    | 32 | India          | 32 | Sudan        | 32 | Congo         | 32 |
| Uruguay        | 33 | Cambodia       | 33 | Burkina Faso | 33 | Afghanistan   | 33 |
| Somalia        | 34 | Cameroon       | 34 | Brazil       | 34 | Uganda        | 34 |
| Cambodia       | 35 | Uzbekistan     | 35 | Bahamas      | 35 | Niger         | 35 |
| New Zealand    | 36 | Gambia         | 36 | Myanmar      | 36 | Mozambique    | 36 |
| Lithuania      | 37 | Guyana         | 37 | Suriname     | 37 | Guinea        | 37 |
| Denmark        | 38 | Belize         | 38 | Hungary      | 38 | Sudan         | 38 |
| Australia      | 39 | Sri Lanka      | 39 | Moldova      | 39 | Timor-Leste   | 39 |
| Turkey         | 40 | Ecuador        | 40 | Kyrgyzstan   | 40 | Kazakhstan    | 40 |
| Viet Nam       | 41 | Benin          | 41 | Kazakhstan   | 41 | Namibia       | 41 |
| Slovenia       | 42 | Algeria        | 42 | Iraq         | 42 | South Sudan   | 42 |
| Canada         | 43 | Nepal          | 43 | Belize       | 43 | Guinea-Bissau | 43 |
| Antigua/Bar.   | 44 | Morocco        | 44 | Libya        | 44 | Kyrgyzstan    | 44 |
| Luxembourg     | 45 | Indonesia      | 45 | Gabon        | 45 | Ghana         | 45 |
| Serbia         | 46 | Maldives       | 46 | Madagascar   | 46 | Gabon         | 46 |
| Germany        | 47 | Mexico         | 47 | Bolivia      | 47 | South Africa  | 47 |
| Sudan          | 48 | Togo           | 48 | Afghanistan  | 48 | Senegal       | 48 |
| Portugal       | 49 | Dominican Rep. | 49 | Slovenia     | 49 | Botswana      | 49 |
| Netherlands    | 50 | Mali           | 50 | Sierra Leone | 50 | Ethiopia      | 50 |
| Lebanon        | 51 | Mauritania     | 51 | Mongolia     | 51 | Bolivia       | 51 |
| Belarus        | 52 | Turkey         | 52 | Tunisia      | 52 | Mauritania    | 52 |
| Romania        | 53 | Guinea-Bissau  | 53 | Djibouti     | 53 | Djibouti      | 53 |
| Czech Republic | 54 | Argentina      | 54 | Bahrain      | 54 | Liberia       | 54 |
| Libya          | 55 | Chad           | 55 | Morocco      | 55 | Malawi        | 55 |
| United Kingdom | 56 | Qatar          | 56 | Austria      | 56 | Rwanda        | 56 |
| Philippines    | 57 | Ghana          | 57 | Greece       | 57 | Tanzania      | 57 |
| Fiji           | 58 | Grenada        | 58 | Cameroon     | 58 | Belarus       | 58 |
| Thailand       | 59 | Equ. Guinea    | 59 | Congo        | 59 | Philippines   | 59 |
| Guatemala      | 60 | Timor-Leste    | 60 | Nigeria      | 60 | Iraq          | 60 |

|                |    |               |    |               |    |                |    |
|----------------|----|---------------|----|---------------|----|----------------|----|
| Kenya          | 61 | Liberia       | 61 | Eritrea       | 61 | Zambia         | 61 |
| Trinidad/Tob.  | 62 | Guinea        | 62 | United States | 62 | Morocco        | 62 |
| Jamaica        | 63 | Botswana      | 63 | Panama        | 63 | Uzbekistan     | 63 |
| Barbados       | 64 | Trinidad/Tob. | 64 | Uruguay       | 64 | Indonesia      | 64 |
| South Sudan    | 65 | Oman          | 65 | Mozambique    | 65 | Azerbaijan     | 65 |
| Ireland        | 66 | Senegal       | 66 | Uganda        | 66 | Armenia        | 66 |
| Timor-Leste    | 67 | Lebanon       | 67 | Burundi       | 67 | Egypt          | 67 |
| Indonesia      | 68 | Panama        | 68 | Laos          | 68 | Suriname       | 68 |
| Sweden         | 69 | Israel        | 69 | Chad          | 69 | Ukraine        | 69 |
| Malaysia       | 70 | Viet Nam      | 70 | Trinidad/Tob. | 70 | Kenya          | 70 |
| Spain          | 71 | Angola        | 71 | Mali          | 71 | Bangladesh     | 71 |
| Russia         | 72 | Romania       | 72 | Finland       | 72 | Brunei         | 72 |
| Suriname       | 73 | Serbia        | 73 | Gambia        | 73 | Russia         | 73 |
| Poland         | 74 | Namibia       | 74 | Benin         | 74 | Sri Lanka      | 74 |
| Chile          | 75 | Mongolia      | 75 | Lebanon       | 75 | Bulgaria       | 75 |
| Uganda         | 76 | Bahamas       | 76 | Rwanda        | 76 | Maldives       | 76 |
| Norway         | 77 | Malaysia      | 77 | South Sudan   | 77 | Dominican Rep. | 77 |
| Albania        | 78 | Niger         | 78 | Togo          | 78 | Croatia        | 78 |
| Honduras       | 79 | Barbados      | 79 | Brunei        | 79 | Saint Lucia    | 79 |
| Switzerland    | 80 | Bangladesh    | 80 | Tanzania      | 80 | New Zealand    | 80 |
| Oman           | 81 | Pakistan      | 81 | Slovakia      | 81 | Algeria        | 81 |
| Montenegro     | 82 | Uruguay       | 82 | Malaysia      | 82 | Slovenia       | 82 |
| Brazil         | 83 | Nigeria       | 83 | Sao Tome      | 83 | Poland         | 83 |
| Madagascar     | 84 | Iran          | 84 | Ethiopia      | 84 | Malaysia       | 84 |
| Nicaragua      | 85 | Burkina Faso  | 85 | Cambodia      | 85 | Luxembourg     | 85 |
| Cuba           | 86 | Colombia      | 86 | Indonesia     | 86 | Viet Nam       | 86 |
| Mexico         | 87 | Kyrgyzstan    | 87 | Switzerland   | 87 | Peru           | 87 |
| Myanmar        | 88 | Saint Lucia   | 88 | Croatia       | 88 | Cyprus         | 88 |
| China          | 89 | Djibouti      | 89 | Somalia       | 89 | Seychelles     | 89 |
| Laos           | 90 | Azerbaijan    | 90 | Cuba          | 90 | Hungary        | 90 |
| Dominican Rep. | 91 | Mauritius     | 91 | Mauritius     | 91 | Israel         | 91 |
| Mozambique     | 92 | Costa Rica    | 92 | Thailand      | 92 | Spain          | 92 |
| South Africa   | 93 | Venezuela     | 93 | Mauritania    | 93 | Lithuania      | 93 |
| Argentina      | 94 | Cyprus        | 94 | Spain         | 94 | Libya          | 94 |
| Peru           | 95 | Brazil        | 95 | Costa Rica    | 95 | Tunisia        | 95 |
| Venezuela      | 96 | Georgia       | 96 | Germany       | 96 | Italy          | 96 |
| Algeria        | 97 | China         | 97 | Georgia       | 97 | Czech Republic | 97 |
| Sri Lanka      | 98 | Gabon         | 98 | Malawi        | 98 | Montenegro     | 98 |

|                |     |                |     |                |     |                |     |
|----------------|-----|----------------|-----|----------------|-----|----------------|-----|
| Ukraine        | 99  | Jamaica        | 99  | Zambia         | 99  | Germany        | 99  |
| Nepal          | 100 | United States  | 100 | Guinea-Bissau  | 100 | Paraguay       | 100 |
| Armenia        | 101 | Estonia        | 101 | Sri Lanka      | 101 | Moldova        | 101 |
| Qatar          | 102 | Chile          | 102 | Grenada        | 102 | Saudi Arabia   | 102 |
| Bulgaria       | 103 | Bosnia/Herzeg. | 103 | Oman           | 103 | Belize         | 103 |
| Mauritius      | 104 | Greece         | 104 | Jamaica        | 104 | Oman           | 104 |
| Sao Tome       | 105 | Montenegro     | 105 | Guinea         | 105 | Latvia         | 105 |
| Bhutan         | 106 | Bulgaria       | 106 | Senegal        | 106 | France         | 106 |
| Finland        | 107 | Honduras       | 107 | Timor-Leste    | 107 | Albania        | 107 |
| Kuwait         | 108 | Antigua/Bar.   | 108 | Iran           | 108 | Belgium        | 108 |
| Moldova        | 109 | Brunei         | 109 | Kuwait         | 109 | Austria        | 109 |
| Belize         | 110 | Singapore      | 110 | Belgium        | 110 | Brazil         | 110 |
| Saudi Arabia   | 111 | Mozambique     | 111 | Kenya          | 111 | Guyana         | 111 |
| Iceland        | 112 | South Sudan    | 112 | Turkey         | 112 | Trinidad/Tob.  | 112 |
| Tunisia        | 113 | Germany        | 113 | Philippines    | 113 | Costa Rica     | 113 |
| Japan          | 114 | Belgium        | 114 | Liberia        | 114 | Slovakia       | 114 |
| Kyrgyzstan     | 115 | Uganda         | 115 | France         | 115 | Kuwait         | 115 |
| Georgia        | 116 | Moldova        | 116 | Paraguay       | 116 | Bosnia/Herzeg. | 116 |
| Pakistan       | 117 | Croatia        | 117 | Dominican Rep. | 117 | Ecuador        | 117 |
| Afghanistan    | 118 | Burundi        | 118 | Viet Nam       | 118 | Romania        | 118 |
| Guyana         | 119 | Japan          | 119 | New Zealand    | 119 | Syria          | 119 |
| Bolivia        | 120 | Ethiopia       | 120 | Seychelles     | 120 | Grenada        | 120 |
| Uzbekistan     | 121 | Congo          | 121 | Netherlands    | 121 | Jamaica        | 121 |
| Rwanda         | 122 | Slovakia       | 122 | Australia      | 122 | Nicaragua      | 122 |
| Malta          | 123 | Somalia        | 123 | Azerbaijan     | 123 | Lebanon        | 123 |
| Morocco        | 124 | Syria          | 124 | Singapore      | 124 | Australia      | 124 |
| Azerbaijan     | 125 | Italy          | 125 | Niger          | 125 | Cuba           | 125 |
| South Korea    | 126 | Austria        | 126 | Czech Republic | 126 | Estonia        | 126 |
| Singapore      | 127 | Albania        | 127 | Cyprus         | 127 | Greece         | 127 |
| Burundi        | 128 | South Korea    | 128 | Chile          | 128 | Bahrain        | 128 |
| Bahrain        | 129 | Eritrea        | 129 | Luxembourg     | 129 | Portugal       | 129 |
| Chad           | 130 | Rwanda         | 130 | Italy          | 130 | Jordan         | 130 |
| Congo          | 131 | Poland         | 131 | Honduras       | 131 | Mexico         | 131 |
| India          | 132 | Tanzania       | 132 | Peru           | 132 | United Kingdom | 132 |
| Haiti          | 133 | Latvia         | 133 | Ireland        | 133 | El Salvador    | 133 |
| Bosnia/Herzeg. | 134 | Malawi         | 134 | Portugal       | 134 | Thailand       | 134 |
| Bahamas        | 135 | Spain          | 135 | Sweden         | 135 | Ireland        | 135 |
| Zimbabwe       | 136 | Zambia         | 136 | Colombia       | 136 | Bahamas        | 136 |



|               |     |                |     |                |     |               |     |
|---------------|-----|----------------|-----|----------------|-----|---------------|-----|
| Cameroon      | 137 | Armenia        | 137 | Nicaragua      | 137 | Uruguay       | 137 |
| Angola        | 138 | Portugal       | 138 | Maldives       | 138 | Netherlands   | 138 |
| Nigeria       | 139 | Ireland        | 139 | Antigua/Bar.   | 139 | Japan         | 139 |
| Mongolia      | 140 | Kenya          | 140 | Jordan         | 140 | Canada        | 140 |
| Zambia        | 141 | Luxembourg     | 141 | United Kingdom | 141 | Denmark       | 141 |
| Namibia       | 142 | Hungary        | 142 | Venezuela      | 142 | United States | 142 |
| Bangladesh    | 143 | Netherlands    | 143 | Denmark        | 143 | Sweden        | 143 |
| Maldives      | 144 | Australia      | 144 | Japan          | 144 | Chile         | 144 |
| Gabon         | 145 | Malta          | 145 | Norway         | 145 | Iran          | 145 |
| Guinea        | 146 | Czech Republic | 146 | El Salvador    | 146 | Qatar         | 146 |
| Burkina Faso  | 147 | Cuba           | 147 | Canada         | 147 | Colombia      | 147 |
| Togo          | 148 | Slovenia       | 148 | China          | 148 | Turkey        | 148 |
| Tanzania      | 149 | Canada         | 149 | Malta          | 149 | Norway        | 149 |
| Niger         | 150 | France         | 150 | Ecuador        | 150 | Panama        | 150 |
| Ghana         | 151 | Norway         | 151 | Bhutan         | 151 | Mauritius     | 151 |
| Botswana      | 152 | Switzerland    | 152 | Iceland        | 152 | Venezuela     | 152 |
| Senegal       | 153 | Lithuania      | 153 | Israel         | 153 | Serbia        | 153 |
| Benin         | 154 | Iceland        | 154 | Qatar          | 154 | Honduras      | 154 |
| Equ. Guinea   | 155 | Madagascar     | 155 | Uzbekistan     | 155 | Singapore     | 155 |
| Liberia       | 156 | Russia         | 156 | Armenia        | 156 | Switzerland   | 156 |
| Mauritania    | 157 | Denmark        | 157 | South Korea    | 157 | Malta         | 157 |
| Sierra Leone  | 158 | Sweden         | 158 | Pakistan       | 158 | Iceland       | 158 |
| Mali          | 159 | Belarus        | 159 | Mexico         | 159 | South Korea   | 159 |
| Brunei        | 160 | New Zealand    | 160 | Guatemala      | 160 | Finland       | 160 |
| Malawi        | 161 | Ukraine        | 161 | India          | 161 | Barbados      | 161 |
| Guinea-Bissau | 162 | United Kingdom | 162 | Nepal          | 162 | Guatemala     | 162 |
| Gambia        | 163 | Finland        | 163 | Bangladesh     | 163 | Antigua/Bar.  | 163 |
